# Supplementary material for: A sequential synthetic strategy towards unexplored dibenzo[b,f][1,4]thiazepine carboxamides: copper catalysed C–S cyclisation followed by Ugi type 3CC cascade
Source: Royal Society of Chemistry journal article supplement (doi:10.1039/c5ra04175a), 2015-01-01

**A Sequential Synthetic Strategy towards Unexplored Dibenzo[*b,f*][1,4]thiazepine  
Carboxamides: Copper Catalysed C-S Cyclisation followed by Ugi type 3CC Cascade**

**Debasmita Saha, Preeti Wadhwa, Anuj Sharma\***

Department of Chemistry, Indian Institute of Technology Roorkee, Roorkee-247667, India

\*e-mail: [anujsfcy@iitr.ernet.in](mailto:anujsfcy@iitr.ernet.in)

1. Copies of <sup>1</sup>H and <sup>13</sup>C NMR spectrum of **dibenzo[*b,f*][1,4]thiazepines(3a-k)** 2-19.
2. Copies of <sup>1</sup>H and <sup>13</sup>C NMR spectrum of  
**10, 11-dihydrodibenzo[*b,f*][1,4]thiazepine-11-carboxamides (6a-m)** 19-39.

# 1) Dibenzo[b,f][1,4]thiazepine 3a

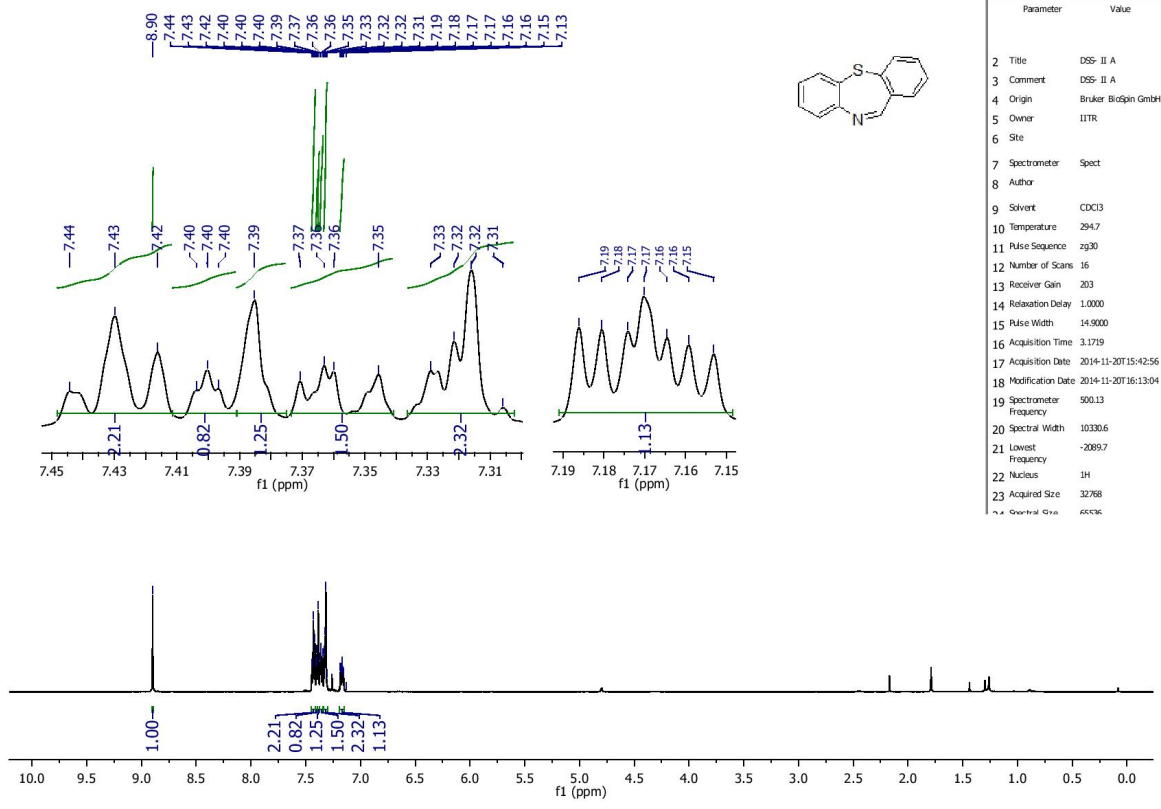

| Parameter                 | Value               |
|---------------------------|---------------------|
| 2 Title                   | DSS- II A           |
| 3 Comment                 | DSS- II A           |
| 4 Origin                  | Bruker BioSpin GmbH |
| 5 Owner                   | IITR                |
| 6 Site                    |                     |
| 7 Spectrometer            | Spect               |
| 8 Author                  |                     |
| 9 Solvent                 | CDCl3               |
| 10 Temperature            | 294.7               |
| 11 Pulse Sequence         | zg30                |
| 12 Number of Scans        | 16                  |
| 13 Receiver Gain          | 203                 |
| 14 Relaxation Delay       | 1.0000              |
| 15 Pulse Width            | 14.9000             |
| 16 Acquisition Time       | 3.1719              |
| 17 Acquisition Date       | 2014-11-20T15:42:56 |
| 18 Modification Date      | 2014-11-20T16:13:04 |
| 19 Spectrometer Frequency | 500.13              |
| 20 Spectral Width         | 10300.6             |
| 21 Lowest Frequency       | -2089.7             |
| 22 Nucleus                | 1H                  |
| 23 Acquired Size          | 32768               |
| 24 Spectral Size          | 65536               |

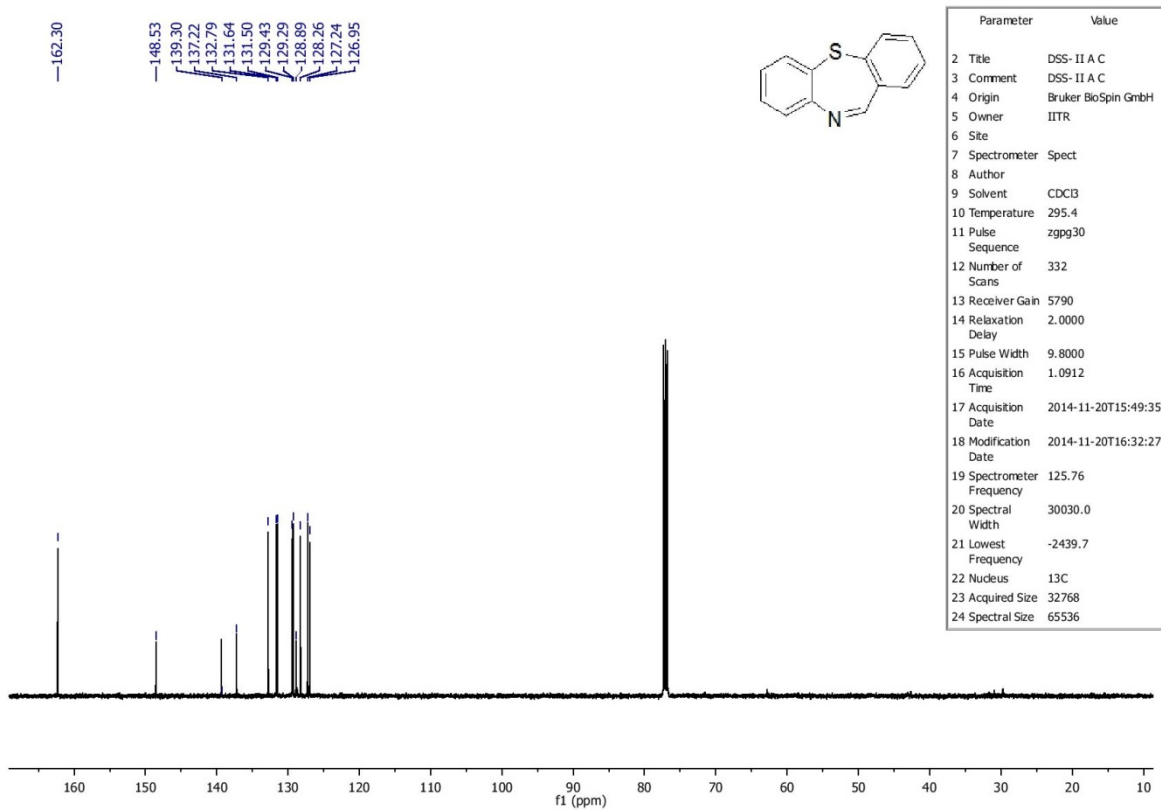

| Parameter                 | Value               |
|---------------------------|---------------------|
| 2 Title                   | DSS- II A C         |
| 3 Comment                 | DSS- II A C         |
| 4 Origin                  | Bruker BioSpin GmbH |
| 5 Owner                   | IITR                |
| 6 Site                    |                     |
| 7 Spectrometer            | Spect               |
| 8 Author                  |                     |
| 9 Solvent                 | CDCl3               |
| 10 Temperature            | 295.4               |
| 11 Pulse Sequence         | zgpg30              |
| 12 Number of Scans        |                     |
| 13 Receiver Gain          | 5790                |
| 14 Relaxation Delay       | 2.0000              |
| 15 Pulse Width            | 9.8000              |
| 16 Acquisition Time       | 1.0912              |
| 17 Acquisition Date       | 2014-11-20T15:49:35 |
| 18 Modification Date      | 2014-11-20T16:32:27 |
| 19 Spectrometer Frequency | 125.76              |
| 20 Spectral Width         | 30030.0             |
| 21 Lowest Frequency       | -2439.7             |
| 22 Nucleus                | 13C                 |
| 23 Acquired Size          | 32768               |
| 24 Spectral Size          | 65536               |

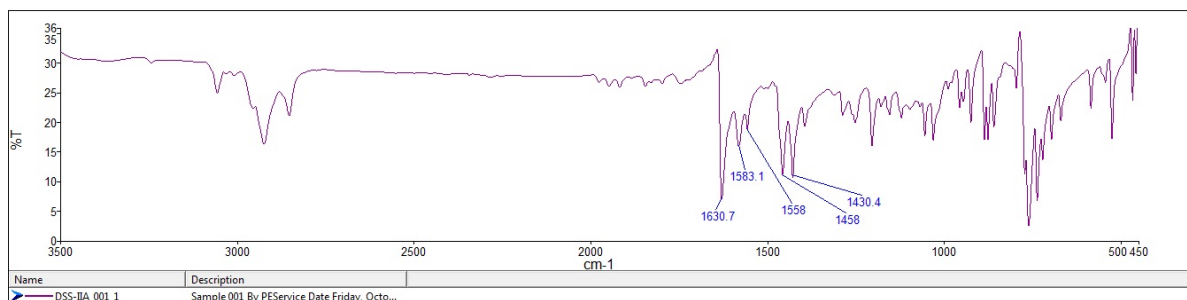

## 2) 2-nitrodibenzo[*b,f*][1,4]thiazepine 3b

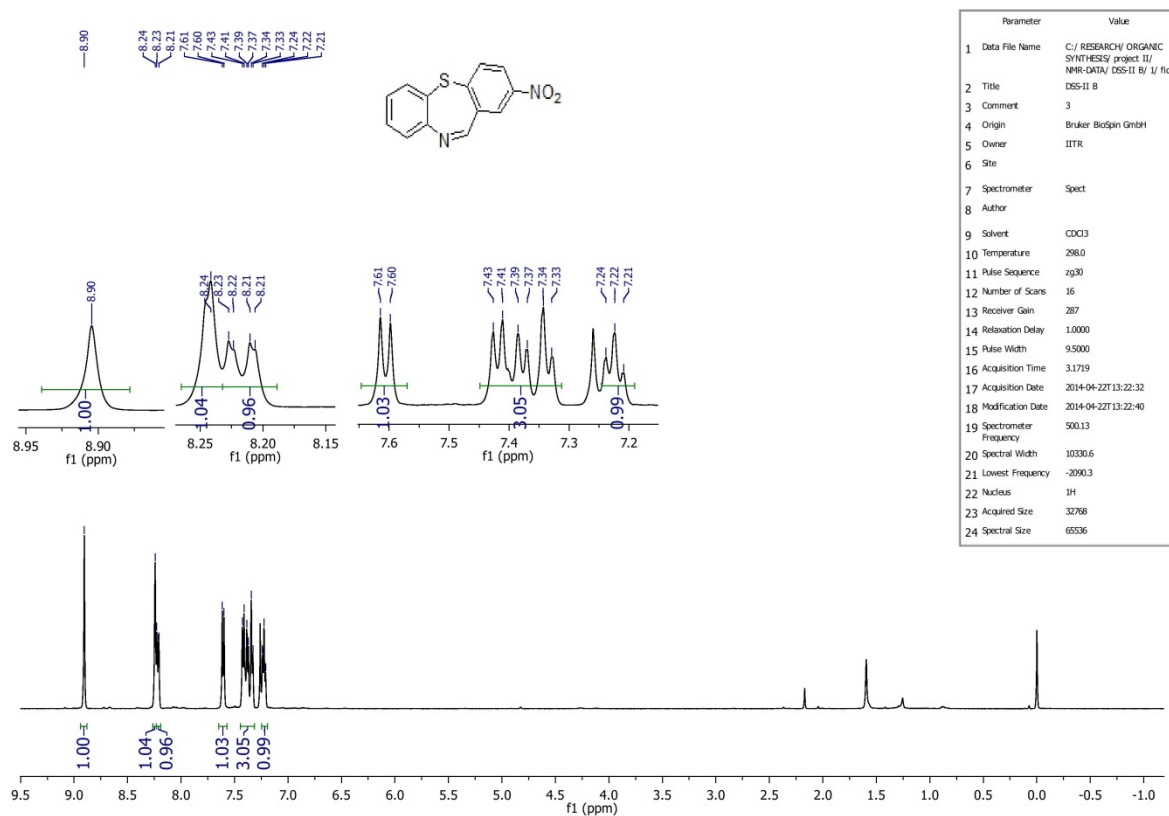

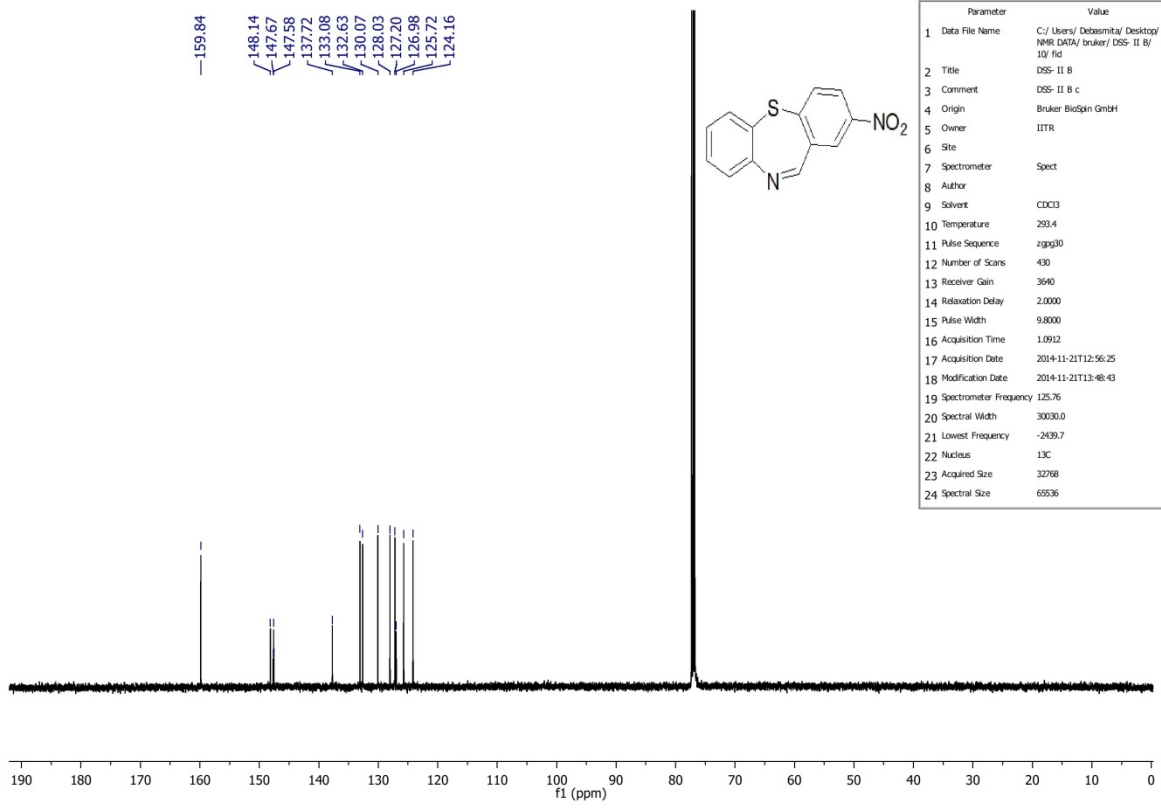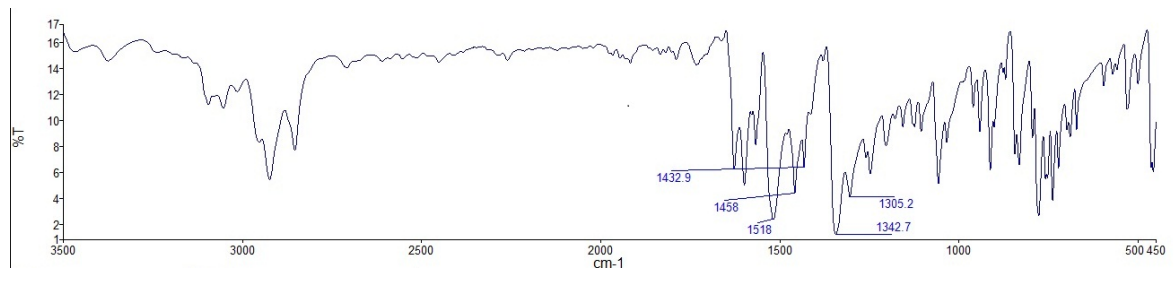

### 3) 8-chlorodibenzo[b,f][1,4]thiazepine 3c

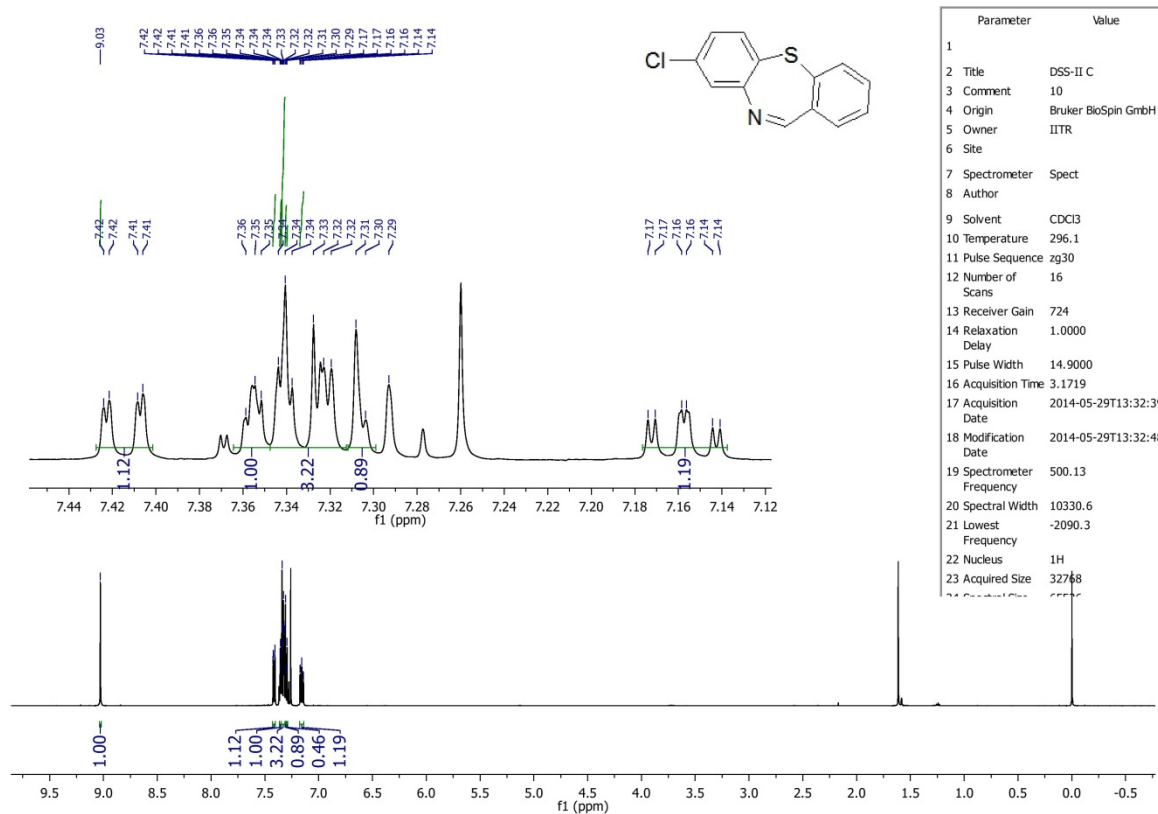

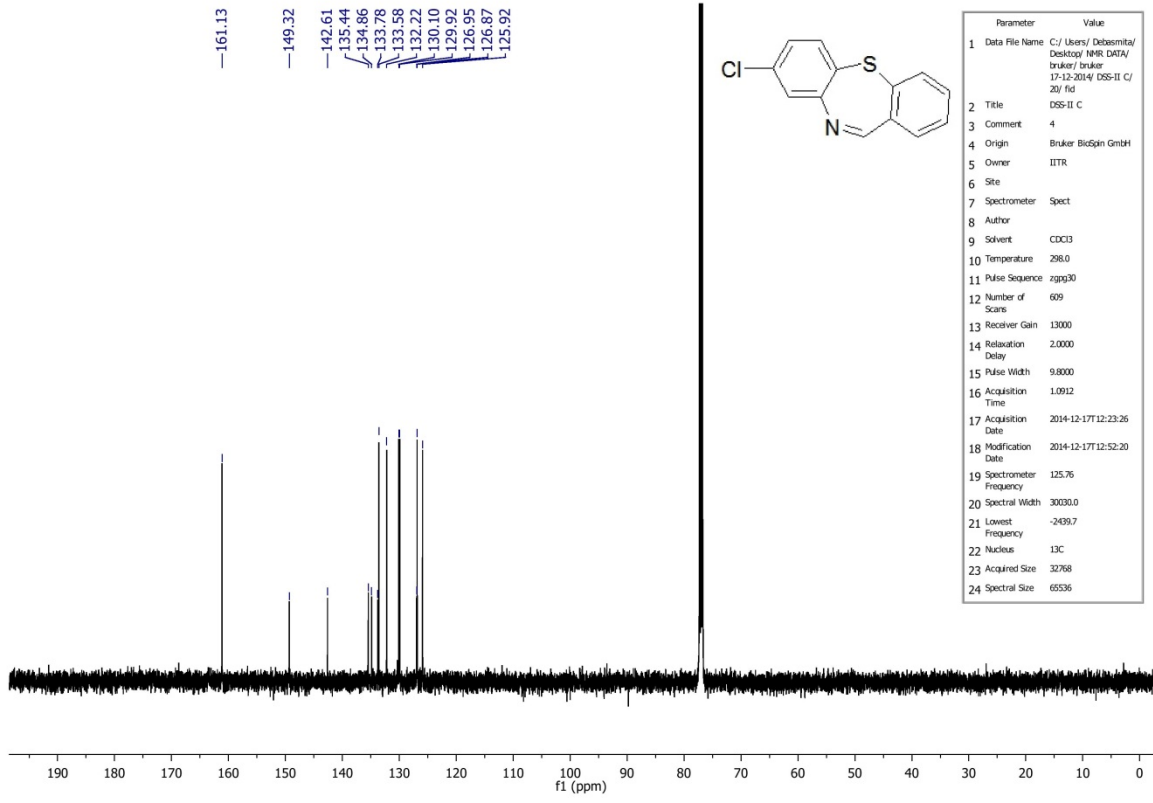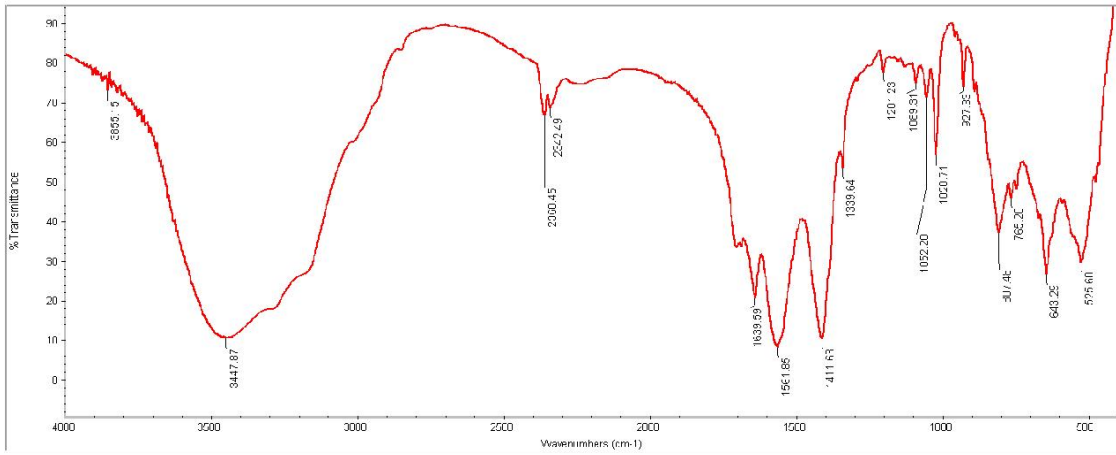

#### 4) 4-(trifluoromethyl)dibenzo[b,f][1,4]thiazepine 3d

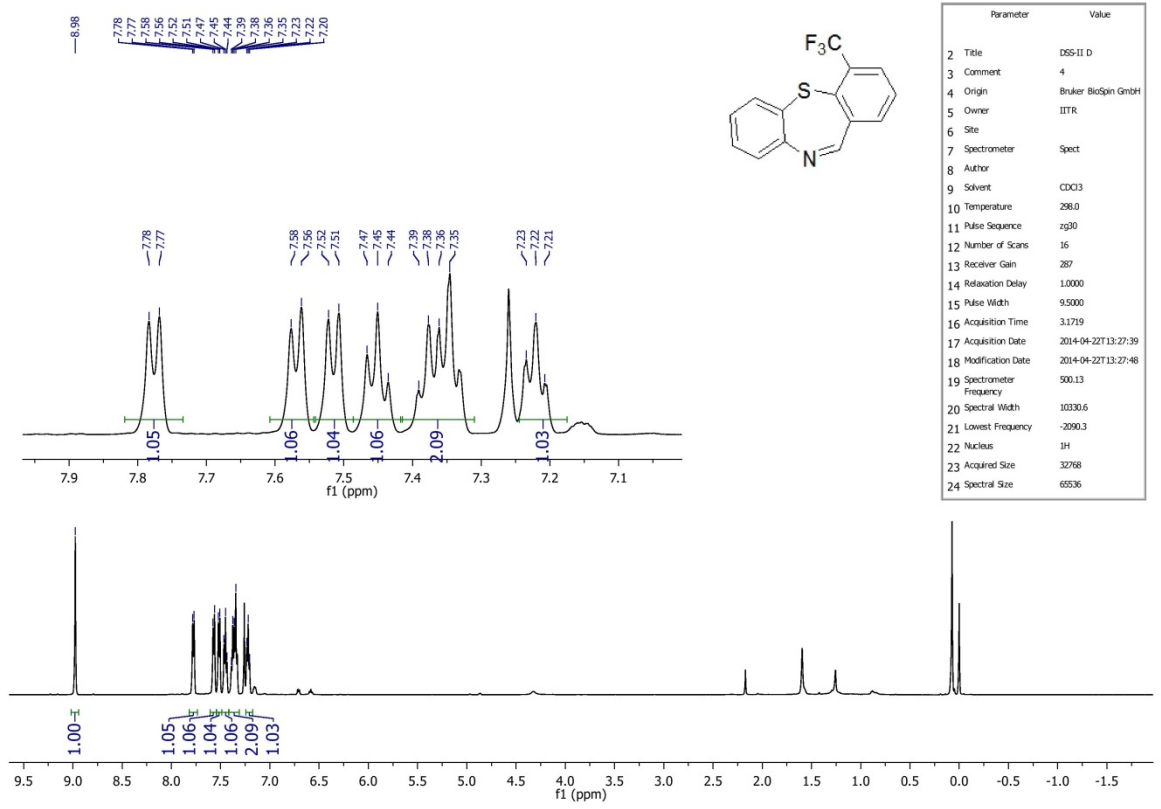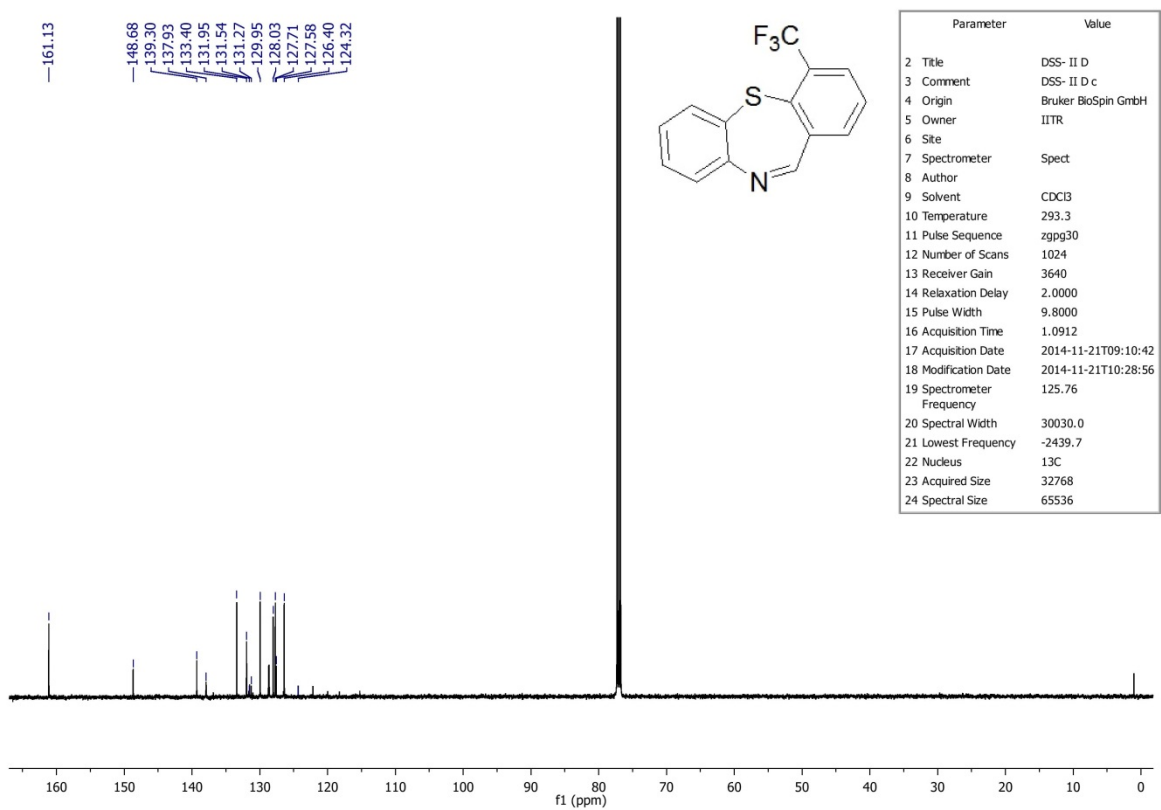

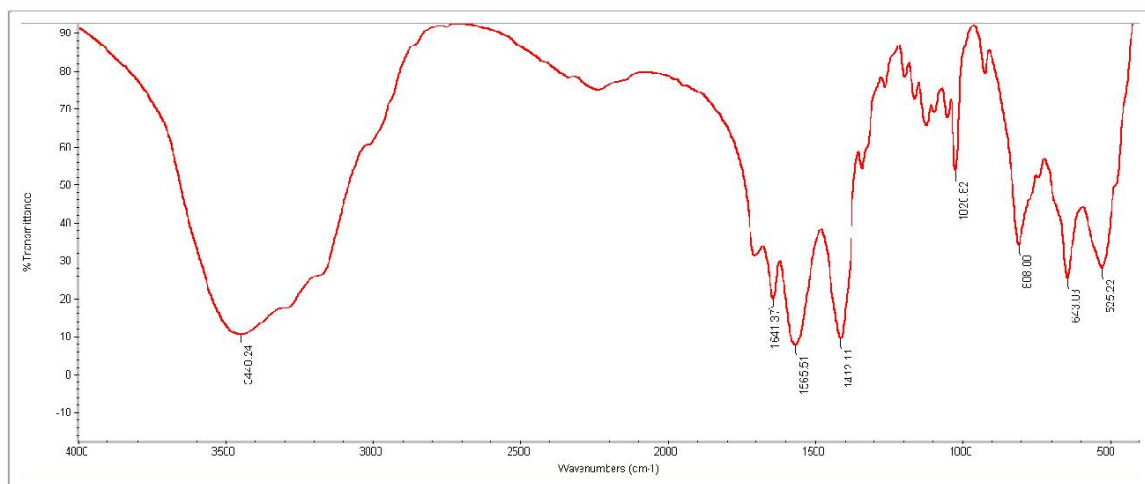

### 5) 8-chloro-2-nitrodibenzo[*b,f*][1,4]thiazepine 3e

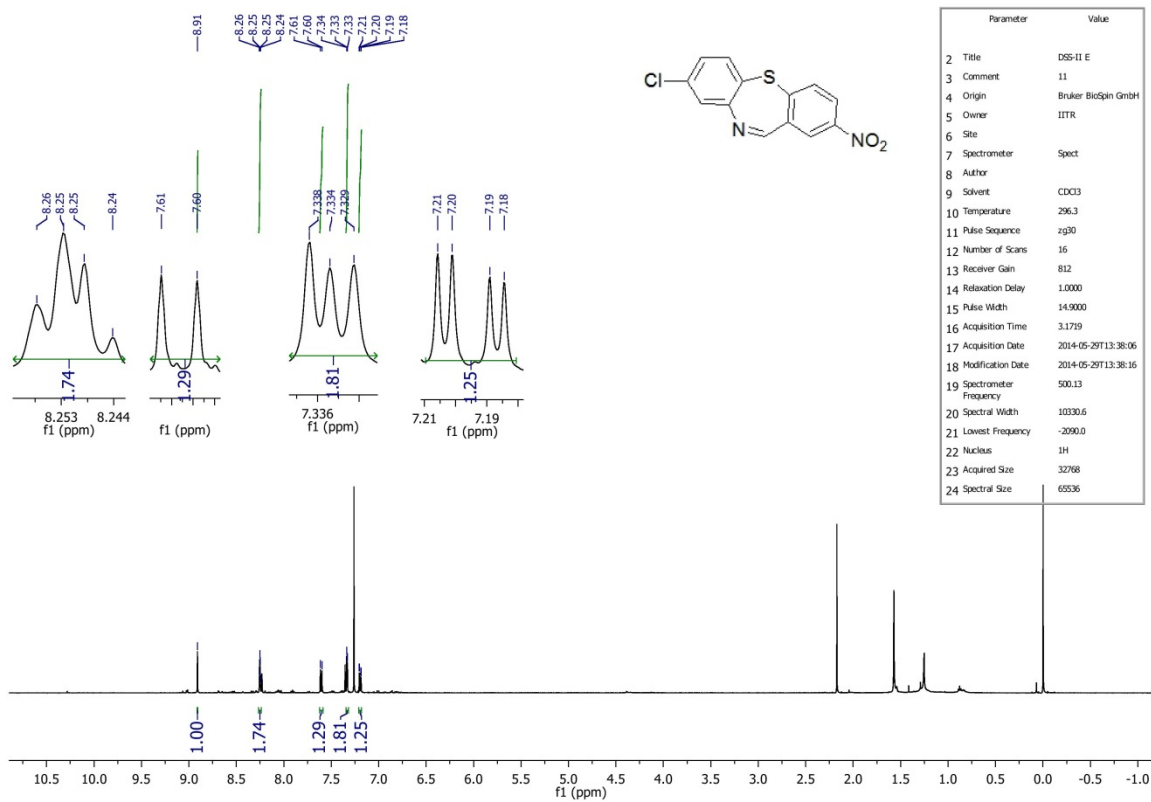



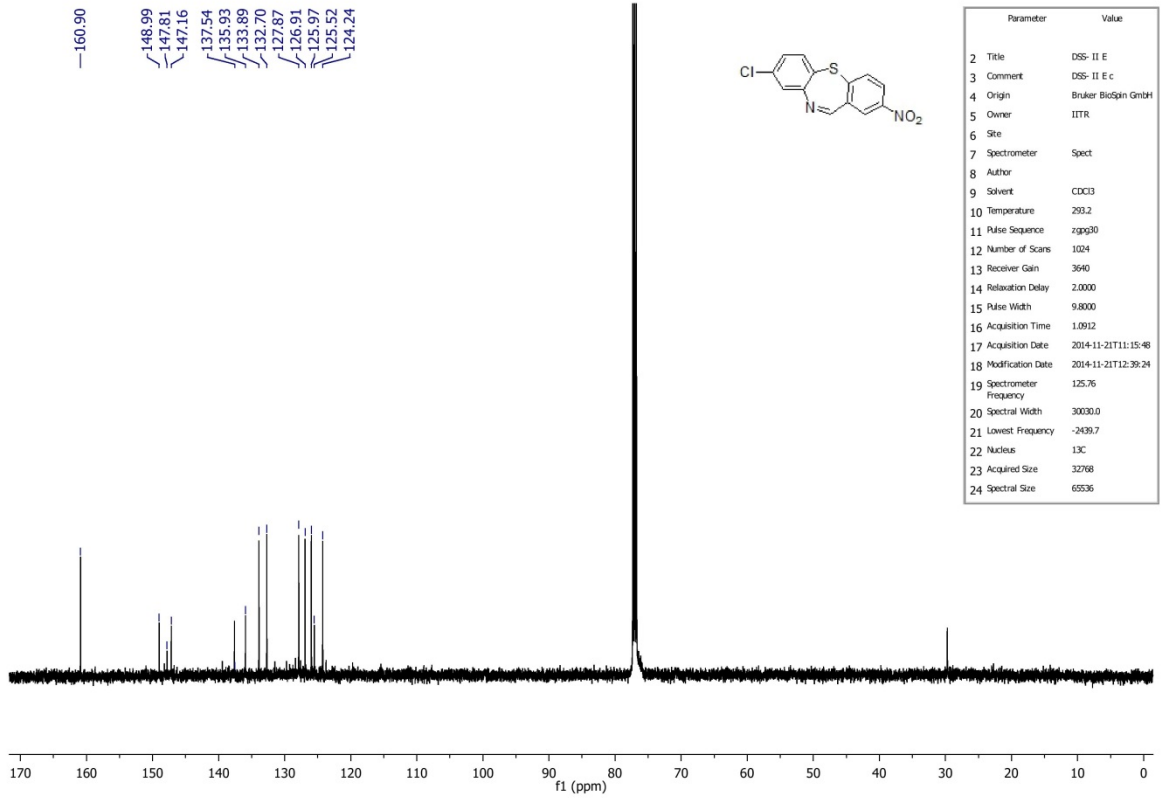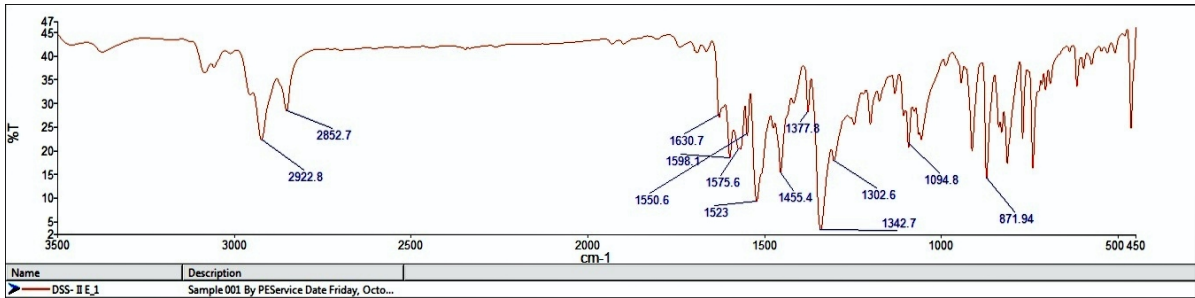

# 6)4-Chlorodibenzo[b,f][1,4]thiazepine 3f

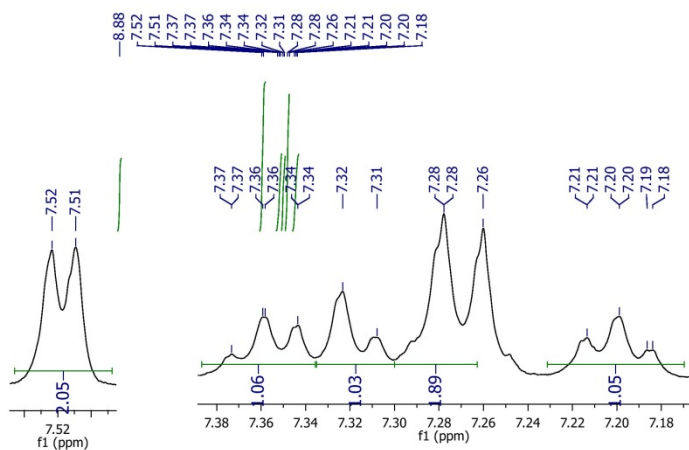

| Parameter            | Value               |
|----------------------|---------------------|
| 1                    |                     |
| 2 Title              | DSS-II G            |
| 3 Comment            | 8                   |
| 4 Origin             | Bruker BioSpin GmbH |
| 5 Owner              | IITR                |
| 6 Site               |                     |
| 7 Spectrometer       | Spect               |
| 8 Author             |                     |
| 9 Solvent            | CDCl3               |
| 10 Temperature       | 298.0               |
| 11 Pulse Sequence    | zg30                |
| 12 Number of Scans   | 16                  |
| 13 Receiver Gain     | 2890                |
| 14 Relaxation Delay  | 1.0000              |
| 15 Pulse Width       | 9.5000              |
| 16 Acquisition Time  | 3.1719              |
| 17 Acquisition Date  | 2014-04-23T13:25:19 |
| 18 Modification Date | 2014-04-23T13:25:28 |
| 19 Spectrometer      | 500.13              |
| 20 Frequency         |                     |
| 21 Spectral Width    | 10330.6             |
| 22 Lowest Frequency  | -2000.3             |
| 23 Nucleus           | 1H                  |
| 24 Acquired Size     | 32768               |

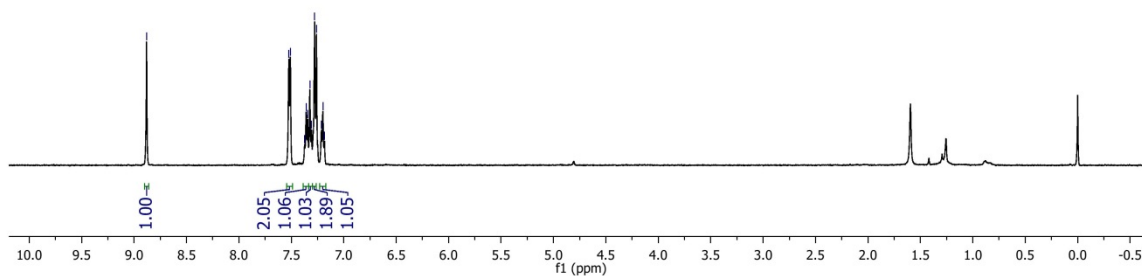

161.49  
148.57  
138.73  
137.80  
135.82  
133.66  
131.74  
129.77  
128.87  
127.57  
127.54  
127.47  
126.64

| Parameter            | Value               |
|----------------------|---------------------|
| 2 Title              | DSS- II G           |
| 3 Comment            | DSS- II G c         |
| 4 Origin             | Bruker BioSpin GmbH |
| 5 Owner              | IITR                |
| 6 Site               |                     |
| 7 Spectrometer       | Spect               |
| 8 Author             |                     |
| 9 Solvent            | CDCl3               |
| 10 Temperature       | 293.5               |
| 11 Pulse Sequence    | zgpg30              |
| 12 Number of Scans   | 129                 |
| 13 Receiver Gain     | 3640                |
| 14 Relaxation Delay  | 2.0000              |
| 15 Pulse Width       | 9.8000              |
| 16 Acquisition Time  | 1.0912              |
| 17 Acquisition Date  | 2014-11-21T11:05:20 |
| 18 Modification Date | 2014-11-21T11:39:49 |
| 19 Spectrometer      | 125.76              |
| 20 Frequency         |                     |
| 21 Spectral Width    | 30030.0             |
| 22 Lowest Frequency  | -3439.7             |
| 23 Nucleus           | 13C                 |
| 24 Acquired Size     | 32768               |
| 25 Spectral Size     | 65536               |

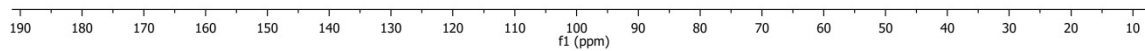

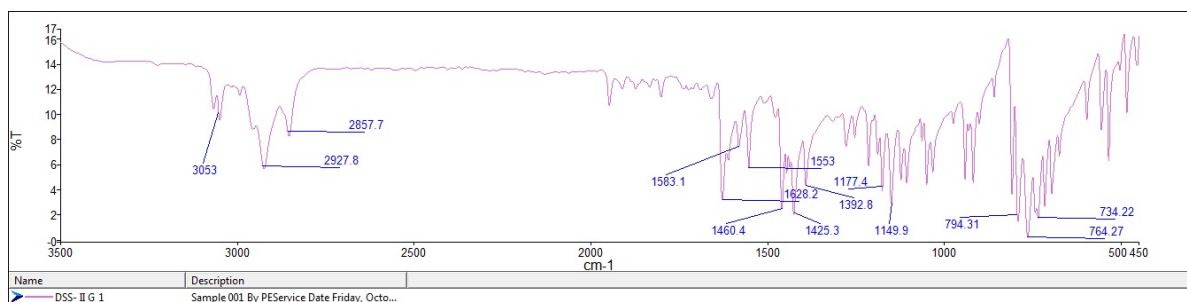

### 7) 4,8-dichlorodibenzo[b,f][1,4]thiazepine 3g

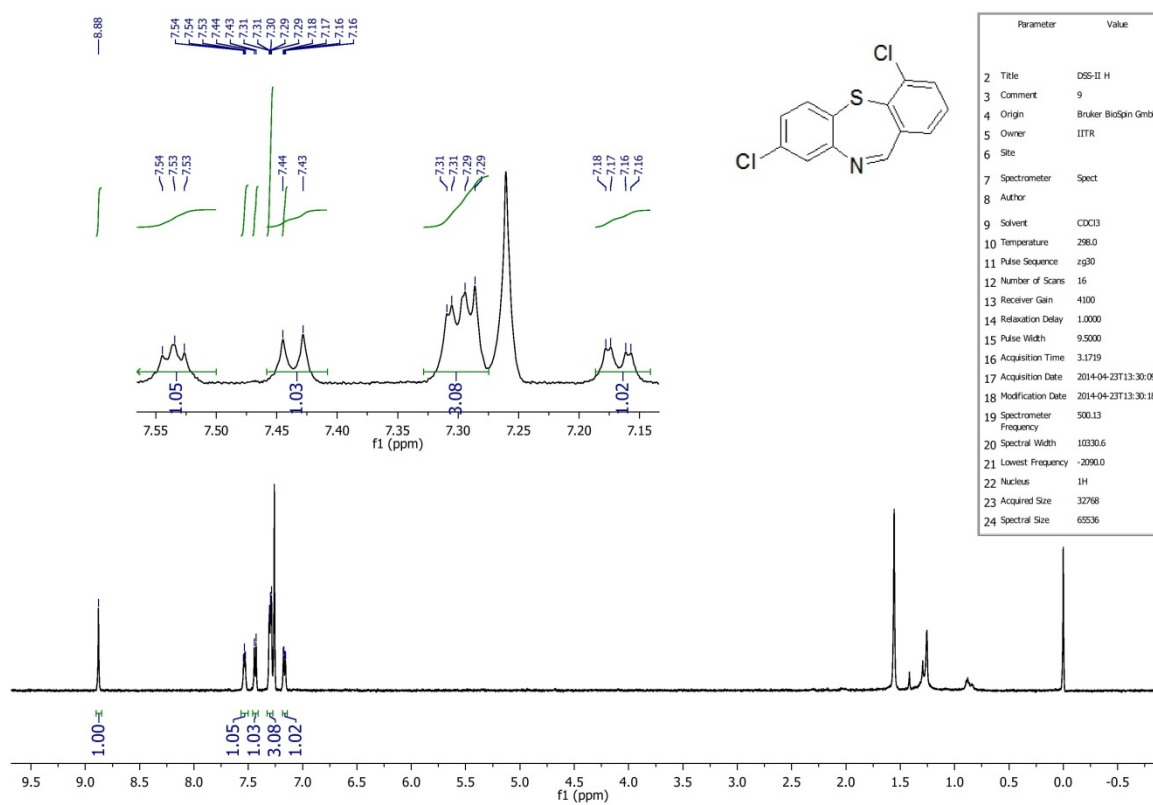

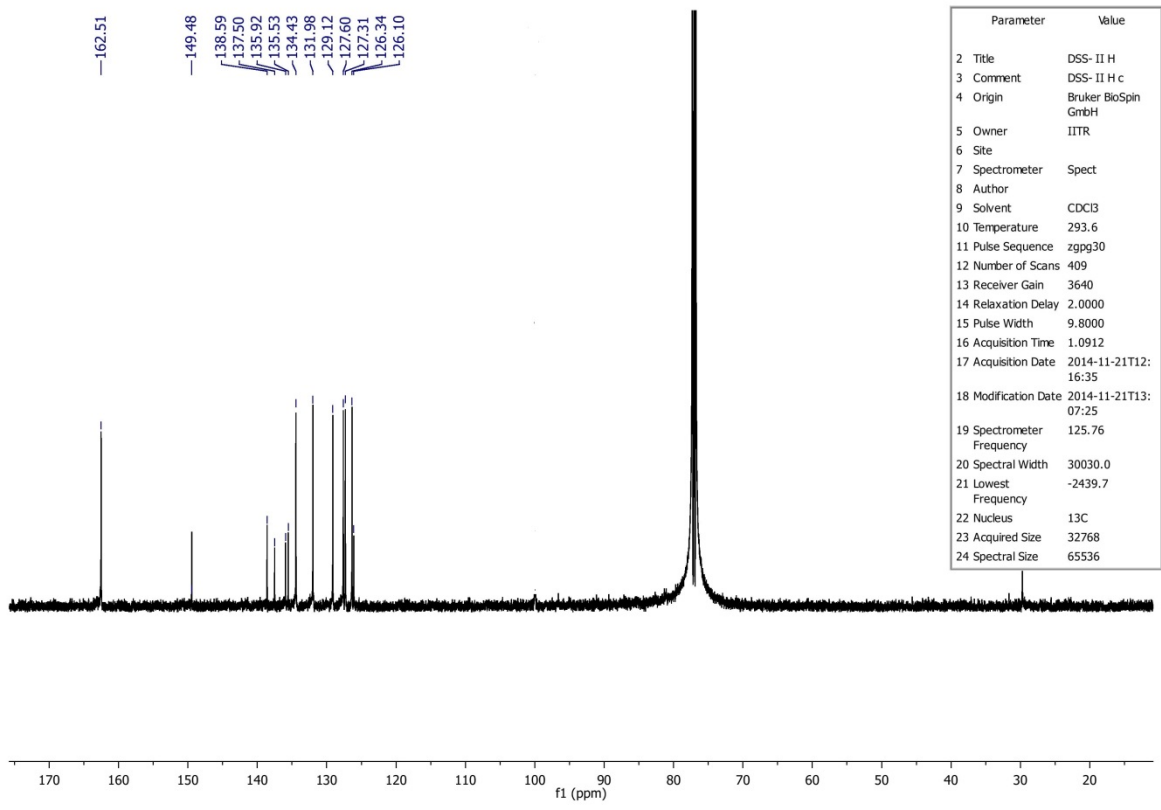

| Parameter                 | Value               |
|---------------------------|---------------------|
| 2 Title                   | DSS- II H           |
| 3 Comment                 | DSS- II H c         |
| 4 Origin                  | Bruker BioSpin GmbH |
| 5 Owner                   | IITR                |
| 6 Site                    |                     |
| 7 Spectrometer            | Spect               |
| 8 Author                  |                     |
| 9 Solvent                 | CDCl3               |
| 10 Temperature            | 293.6               |
| 11 Pulse Sequence         | zgpg30              |
| 12 Number of Scans        | 409                 |
| 13 Receiver Gain          | 3640                |
| 14 Relaxation Delay       | 2.0000              |
| 15 Pulse Width            | 9.8000              |
| 16 Acquisition Time       | 1.0912              |
| 17 Acquisition Date       | 2014-11-21T12:16:35 |
| 18 Modification Date      | 2014-11-21T13:07:25 |
| 19 Spectrometer Frequency | 125.76              |
| 20 Spectral Width         | 30030.0             |
| 21 Lowest Frequency       | -2439.7             |
| 22 Nucleus                | 13C                 |
| 23 Acquired Size          | 32768               |
| 24 Spectral Size          | 65536               |

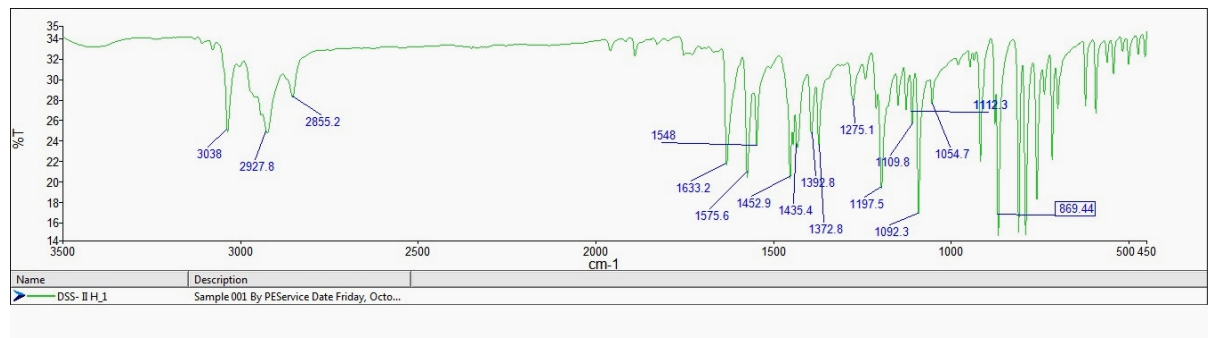

| Name        | Description                                  |
|-------------|----------------------------------------------|
| DSS- II H_1 | Sample 001 By PEService Date Friday, Octo... |

# 8)1-chlorodibenzo[b,f][1,4]thiazepine 3h

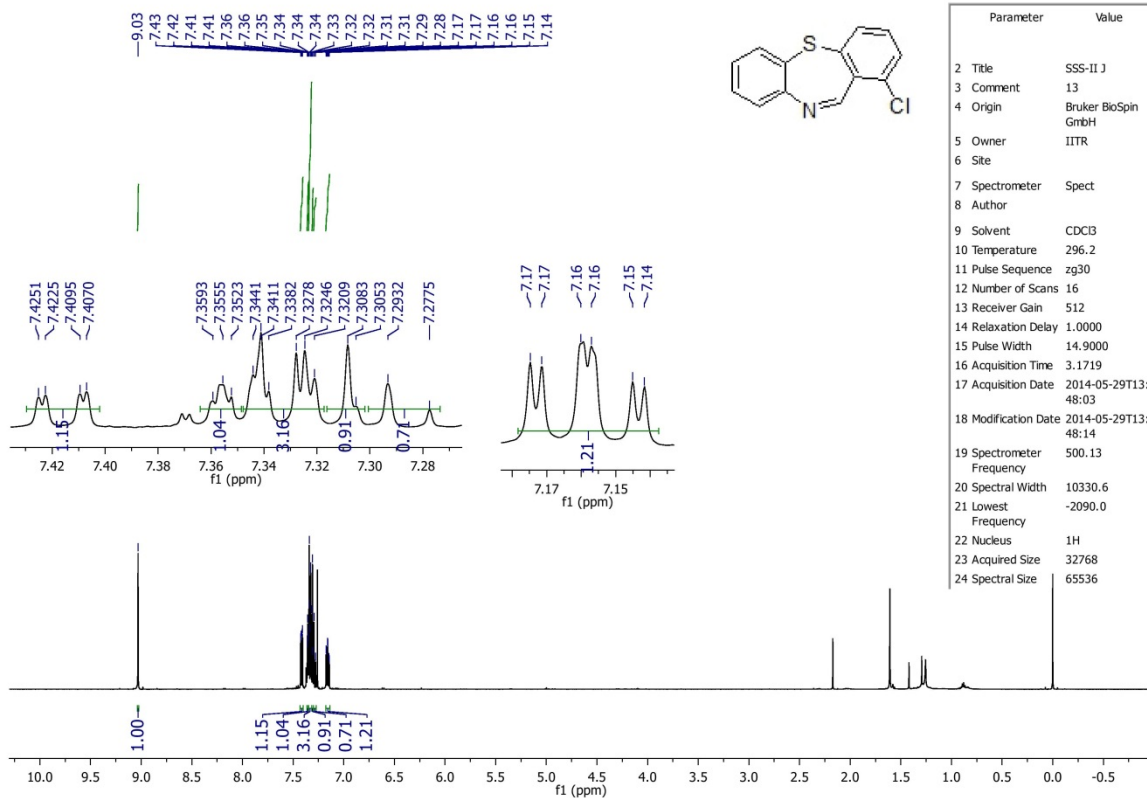

DSS- II J  
DSS- II J c

- 160.11
- 148.45
- 142.96
- 134.75
- 133.85
- 132.79
- 131.99
- 130.10
- 129.71
- 129.65
- 128.38
- 127.00
- 126.19

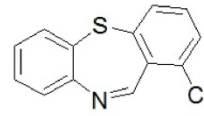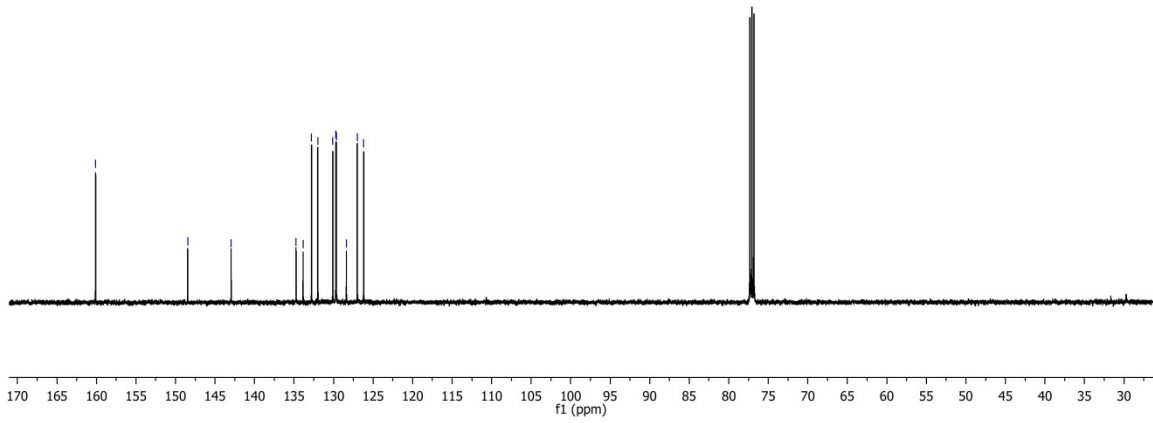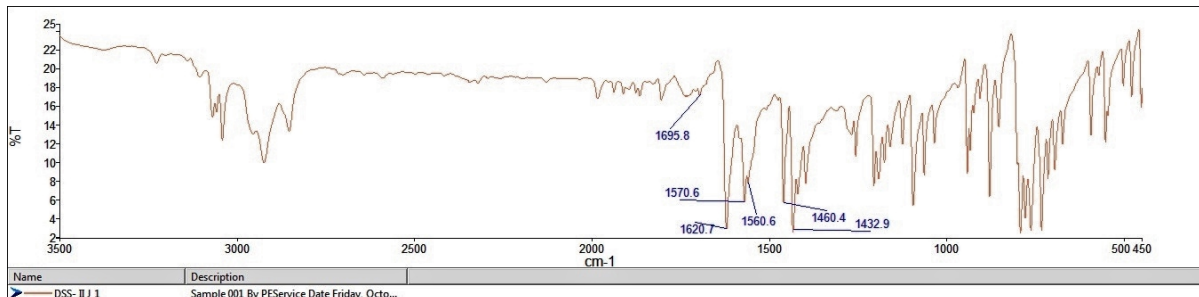

9) 4-chloro-8-(trifluoromethyl)dibenzo[b,f][1,4]thiazepine 3i

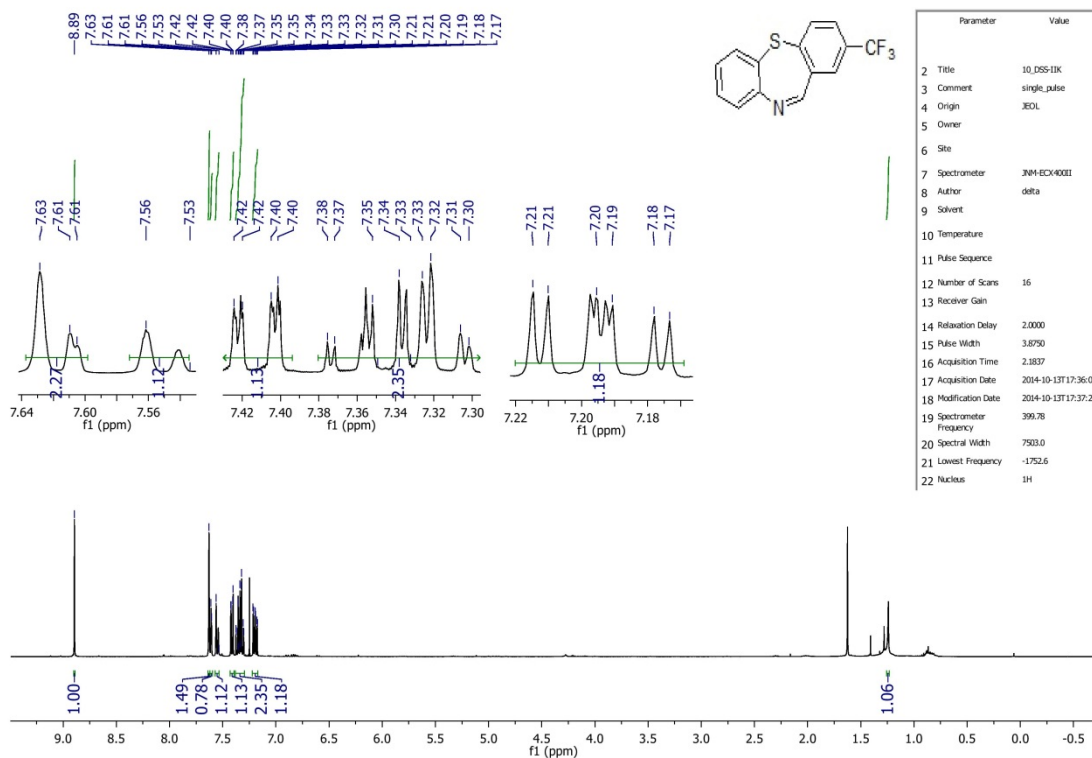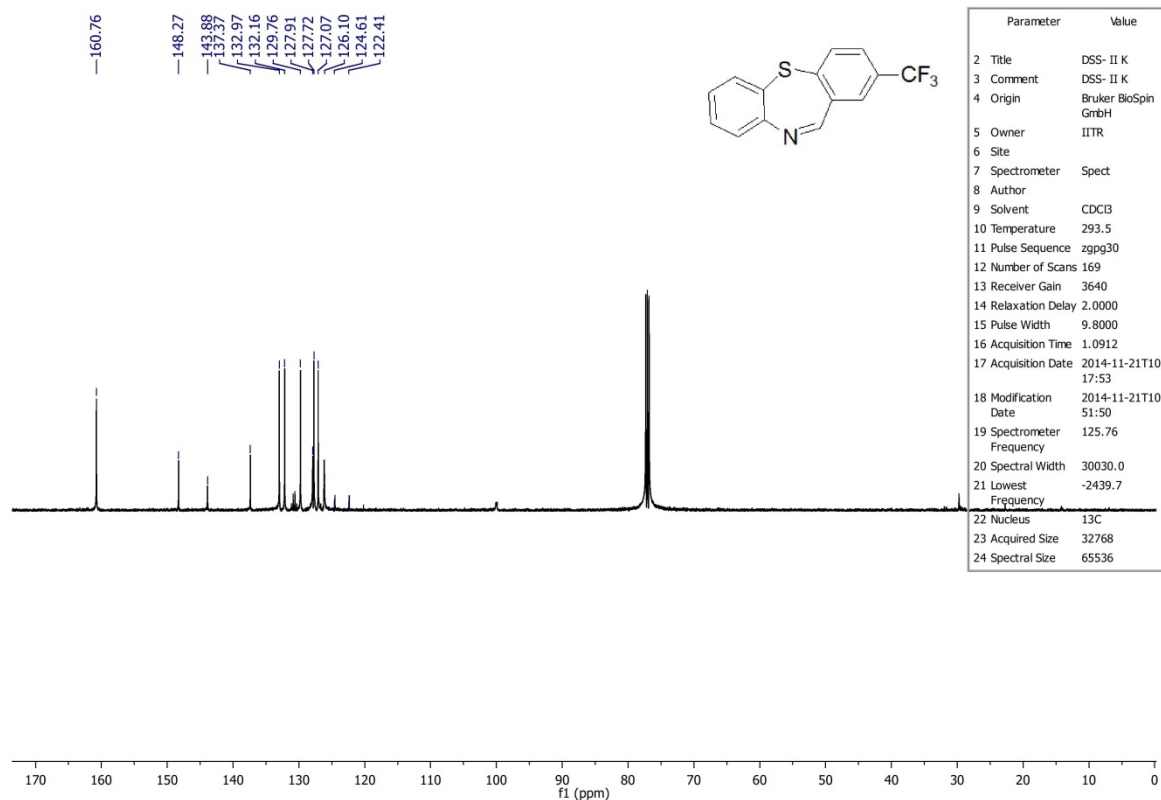

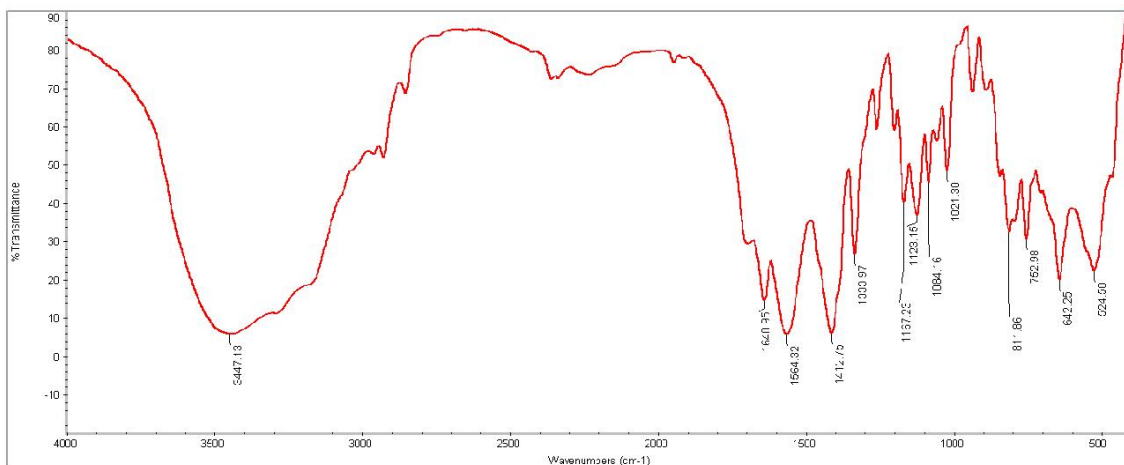

**10) 1,4,8-trichlorodibenzo[*b,f*][1,4]thiazepine 3j**

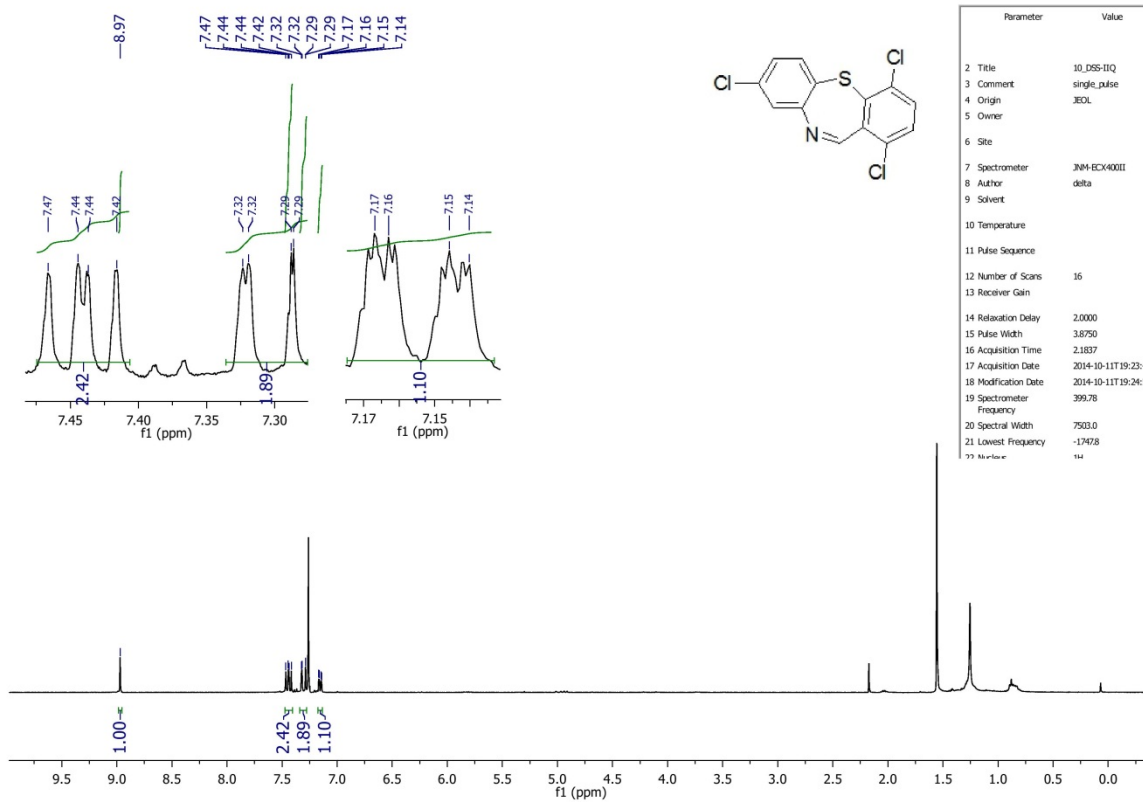



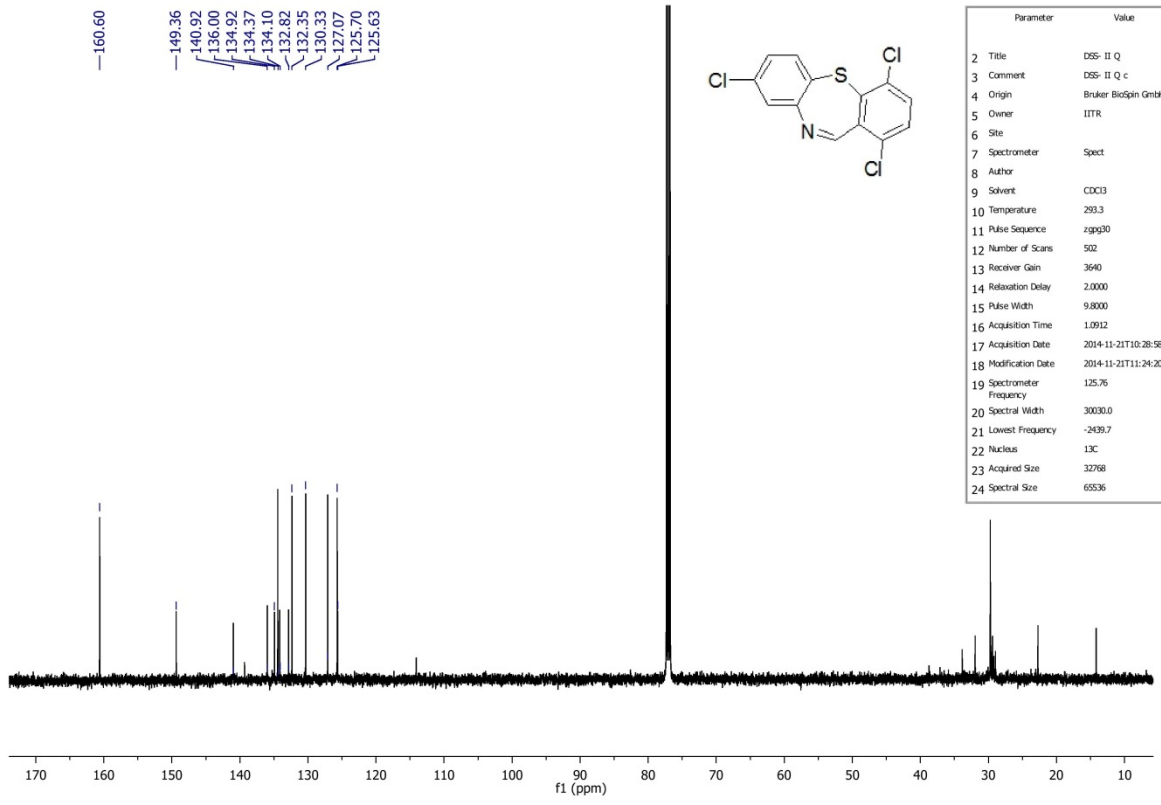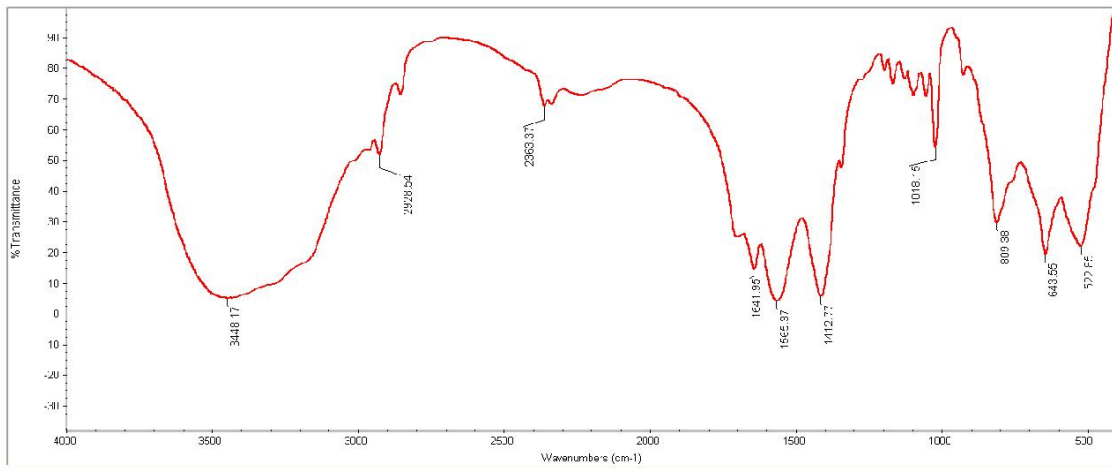

# 11)1,8-dichlorodibenzo[b,f][1,4]thiazepine 3k

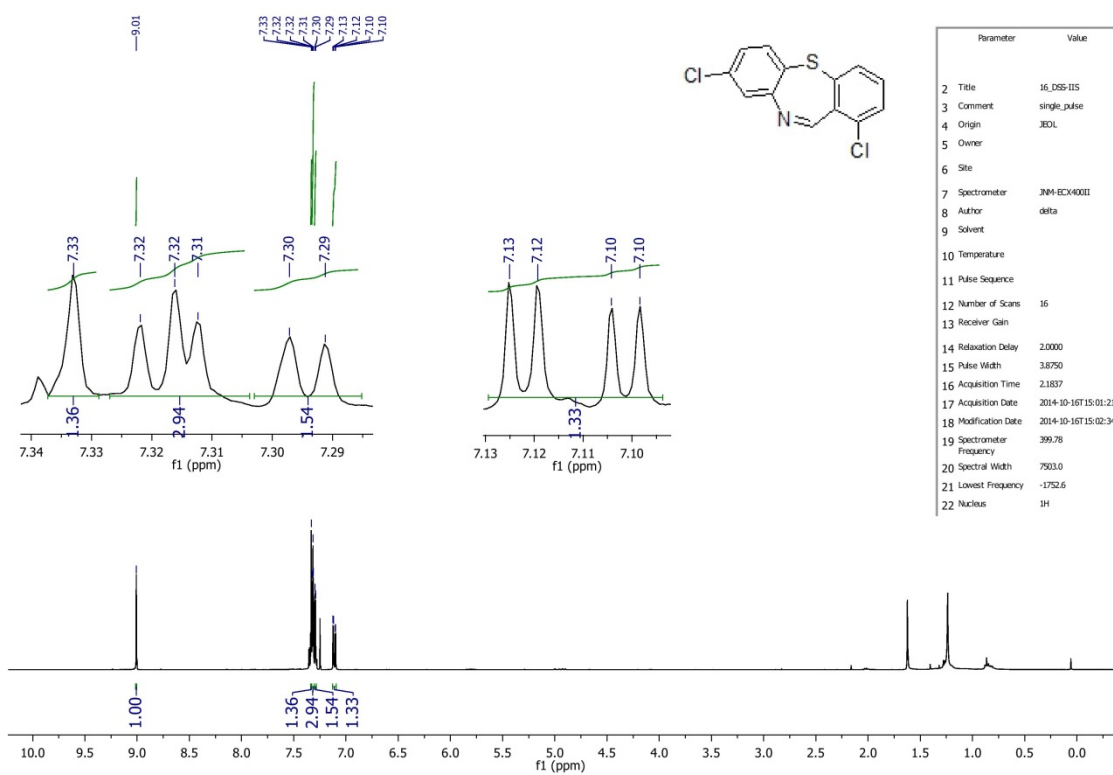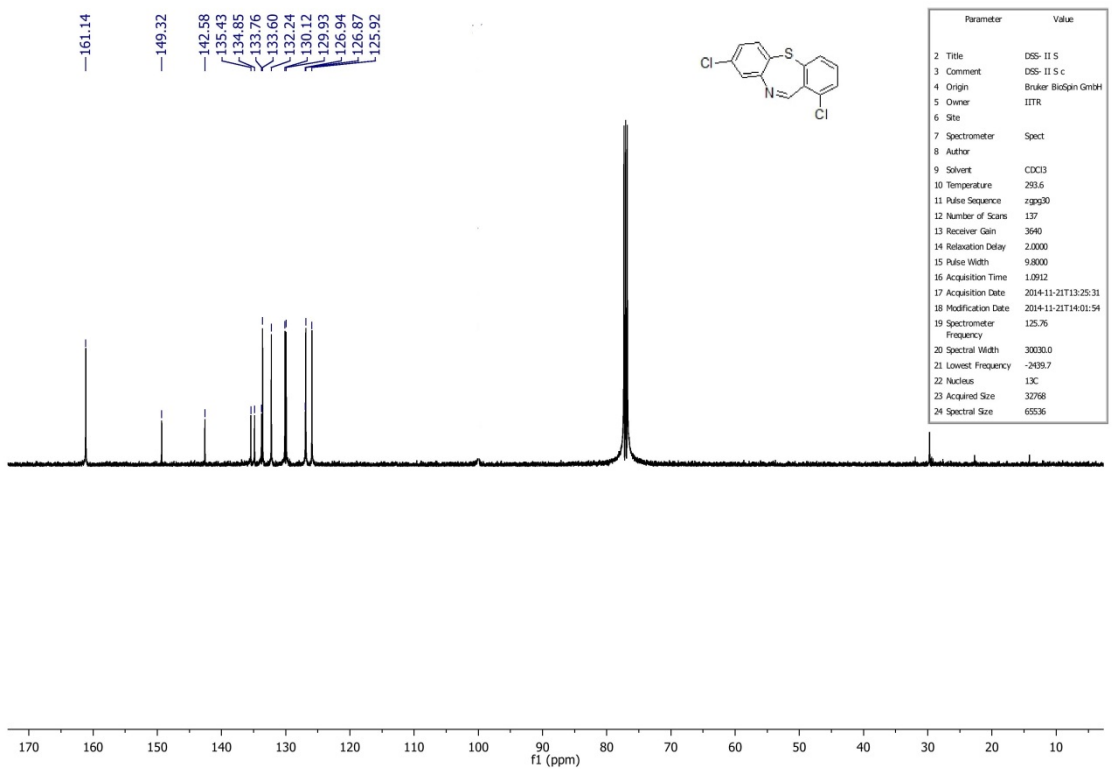

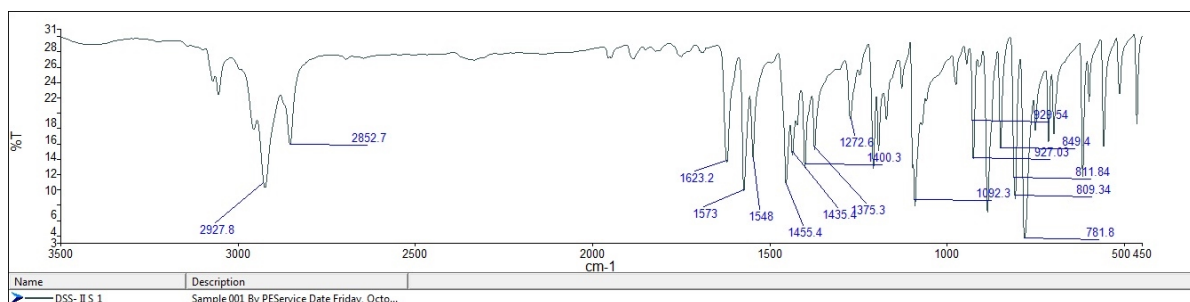

**1) 10-(2-phenylacetyl)-N-(2,3,3-trimethylbutan-2-yl)-10,11 dihydrodibenzo[b,f][1,4]thiazepine-11-carboxamide 6a**

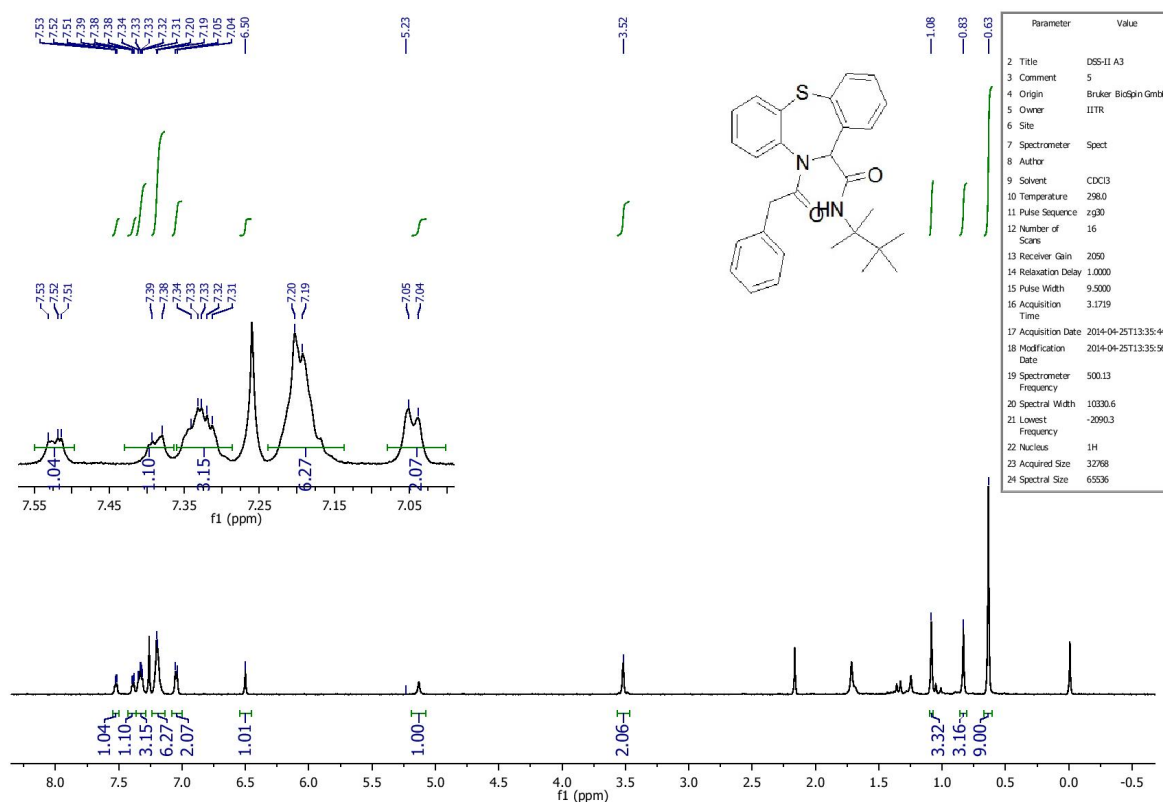

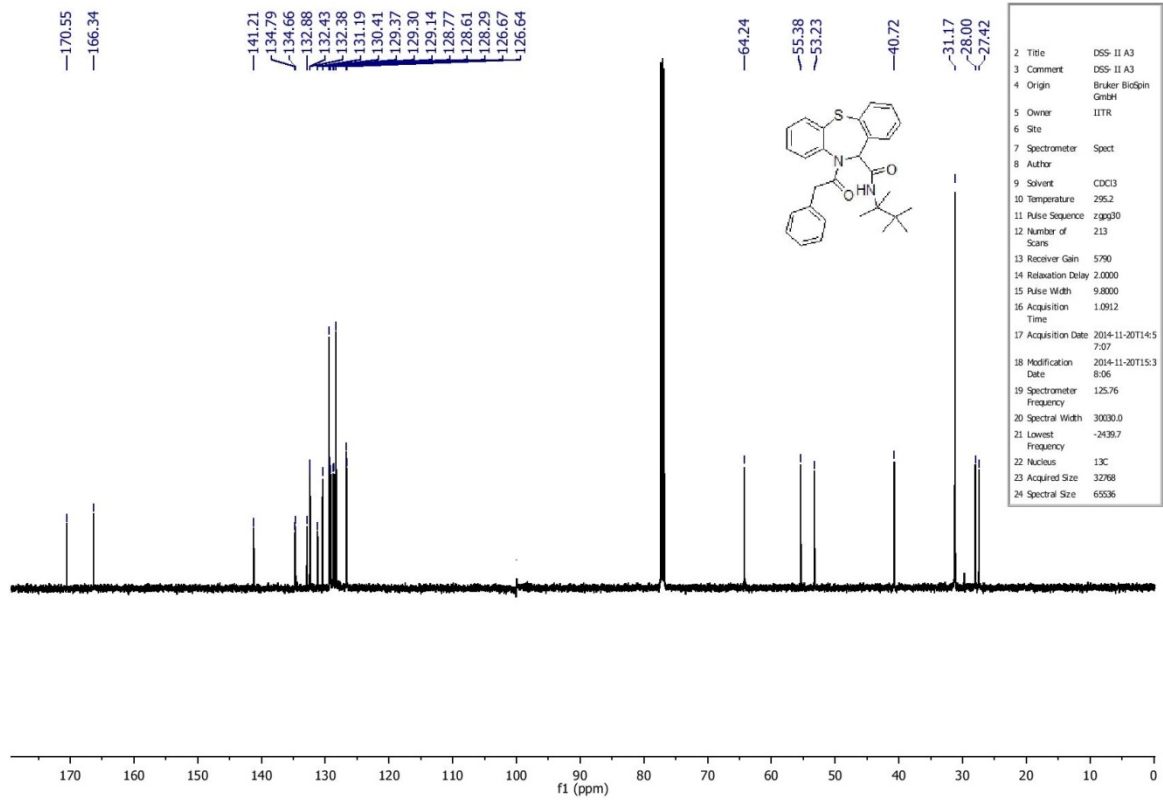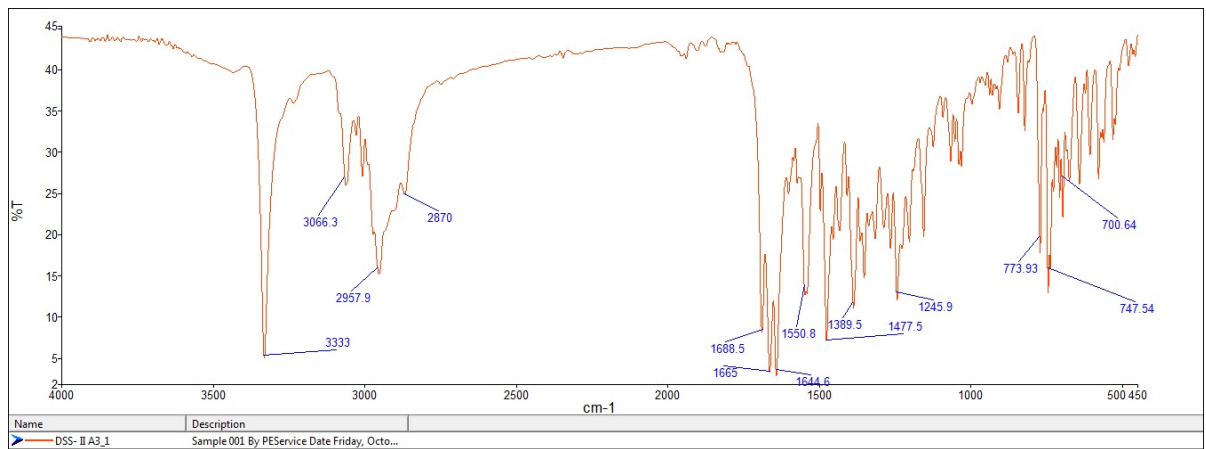

2) *N*-(*tert*-butyl)-10-(4-chlorobenzoyl)-10,11-dihydrodibenzo[*b,f*][1,4]thiazepine-11 carboxamide **6b**

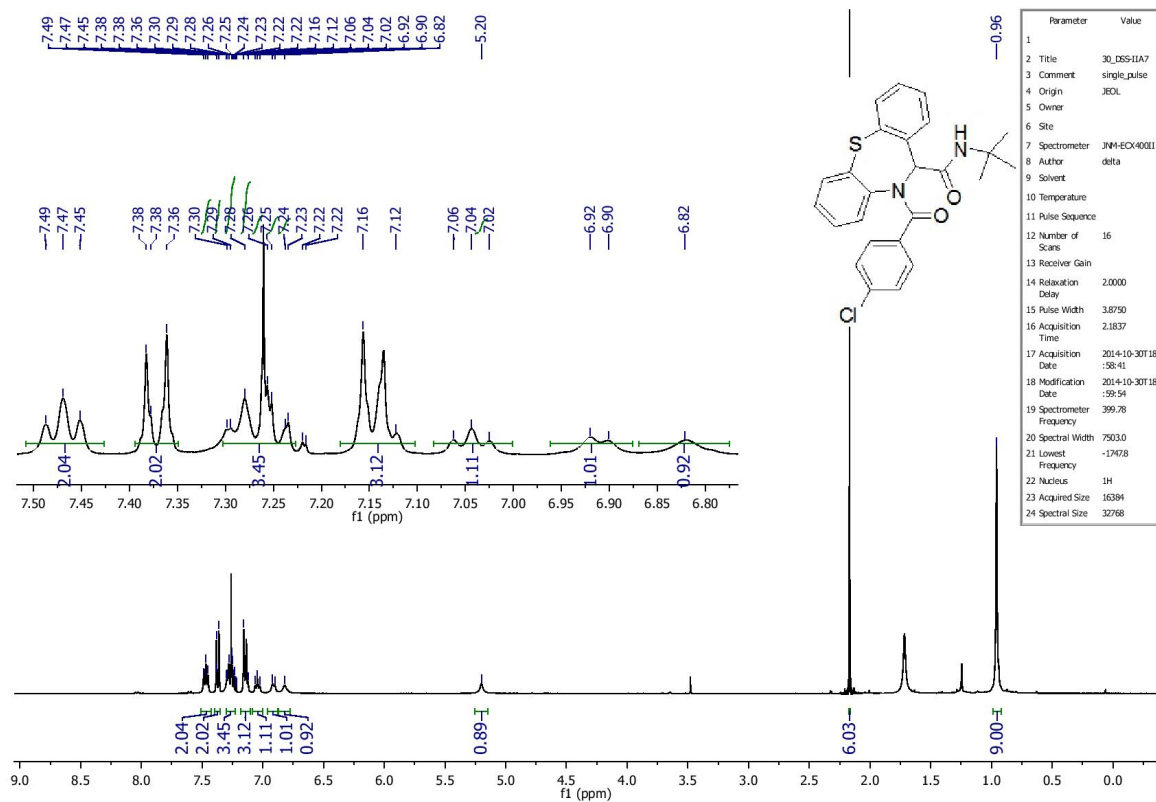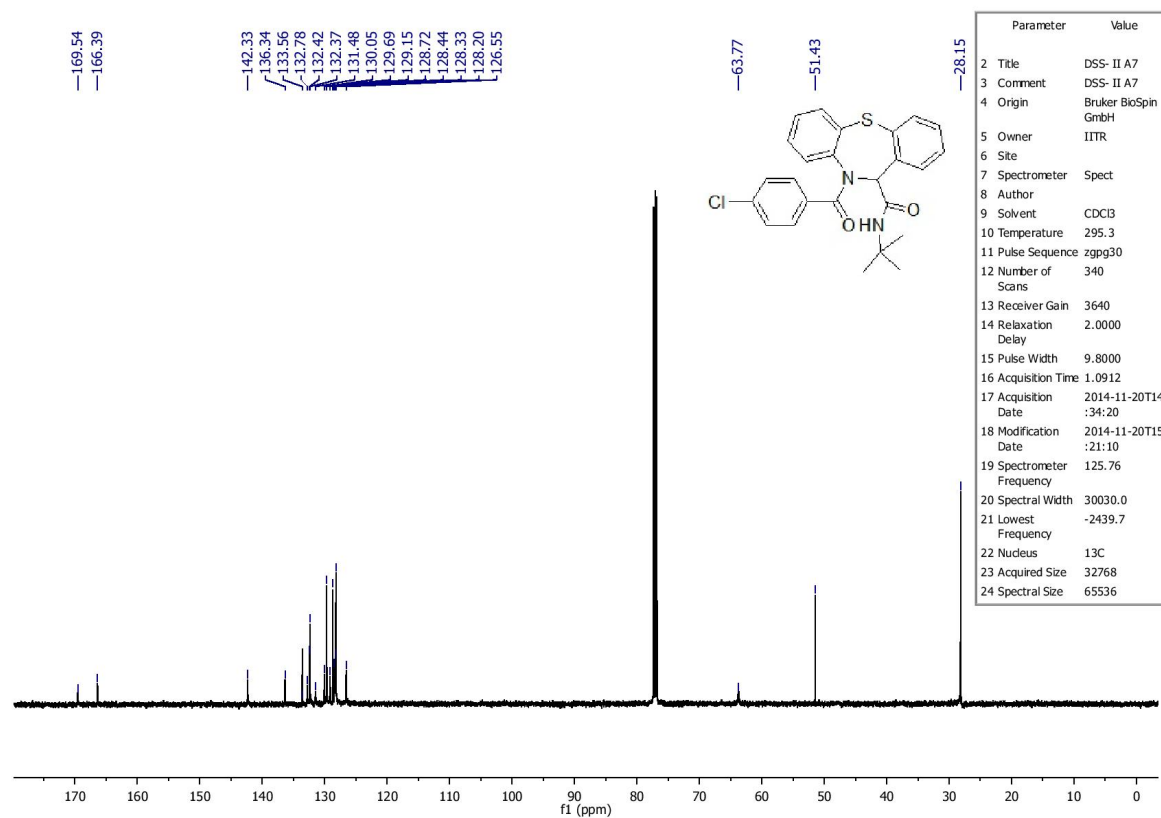

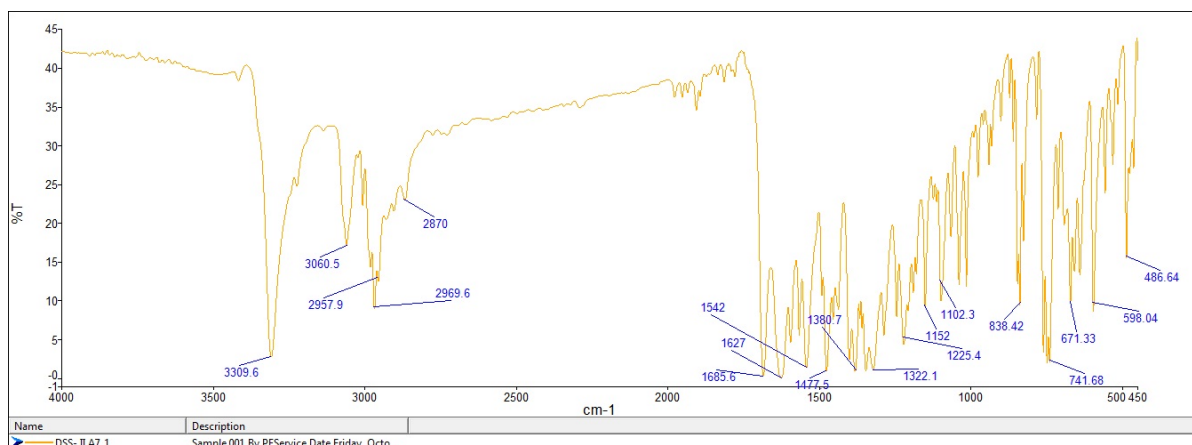

### 3) 10-(4-chlorobenzoyl)-*N*-cyclohexyl-10,11-dihydrobenzo[*b,f*][1,4]thiazepine-11-carboxamide 6c

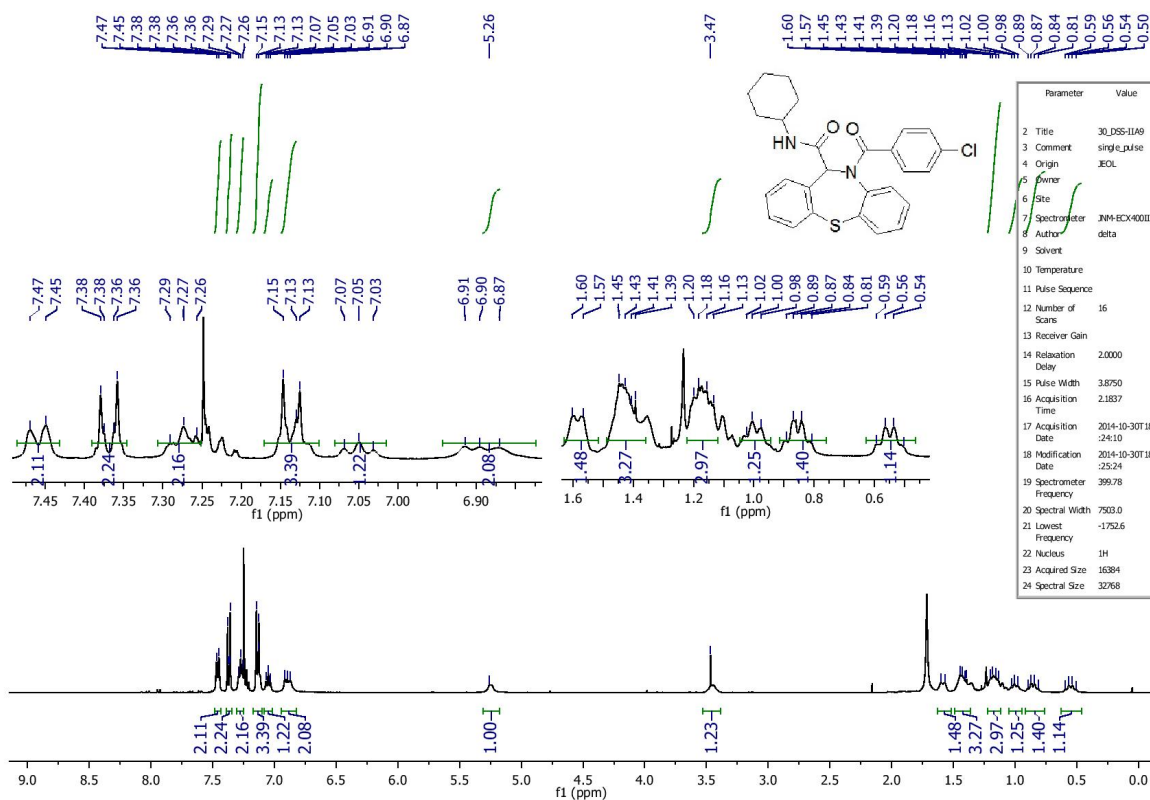

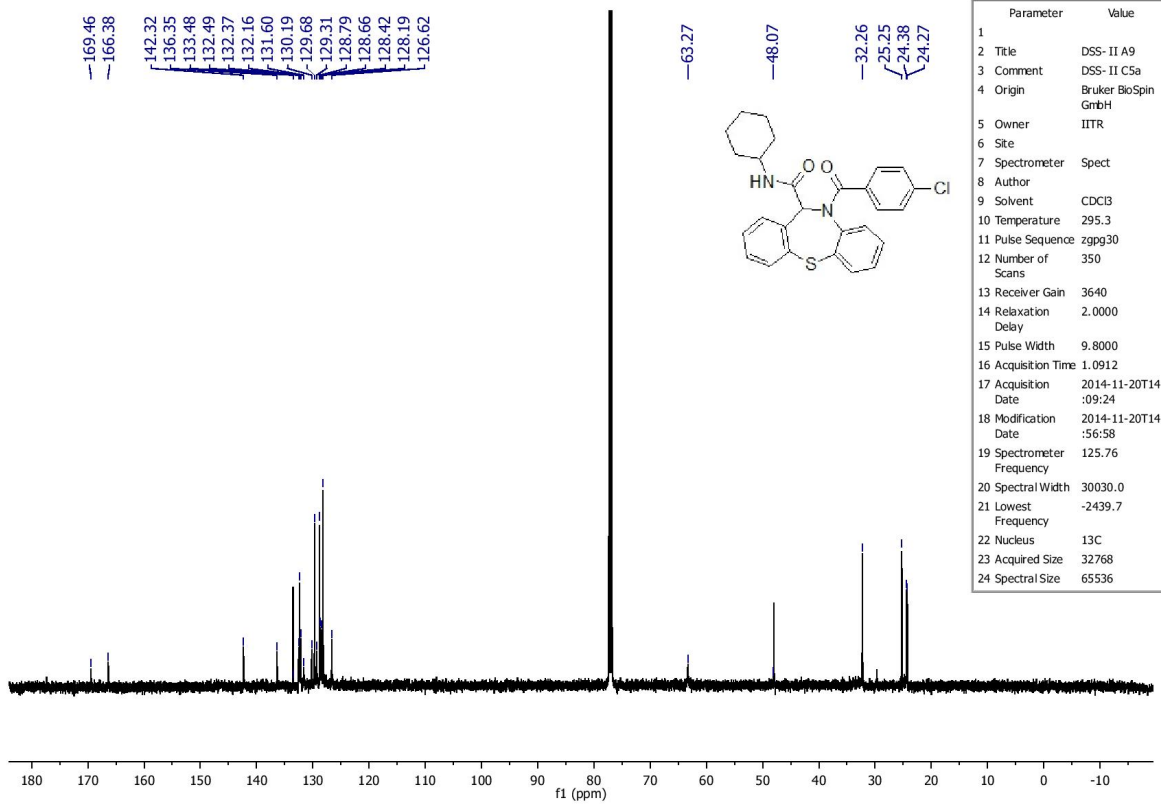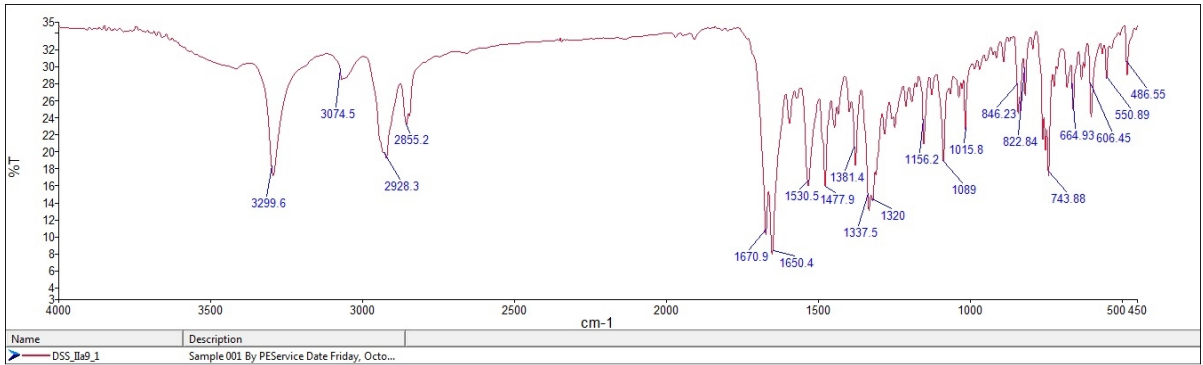

4) 10-(4-cyanobenzoyl)-*N*-(2,6-dimethylphenyl)-10,11-dihydrodibenzo[*b,f*][1,4]thiazepine-11-carboxamide **6d**

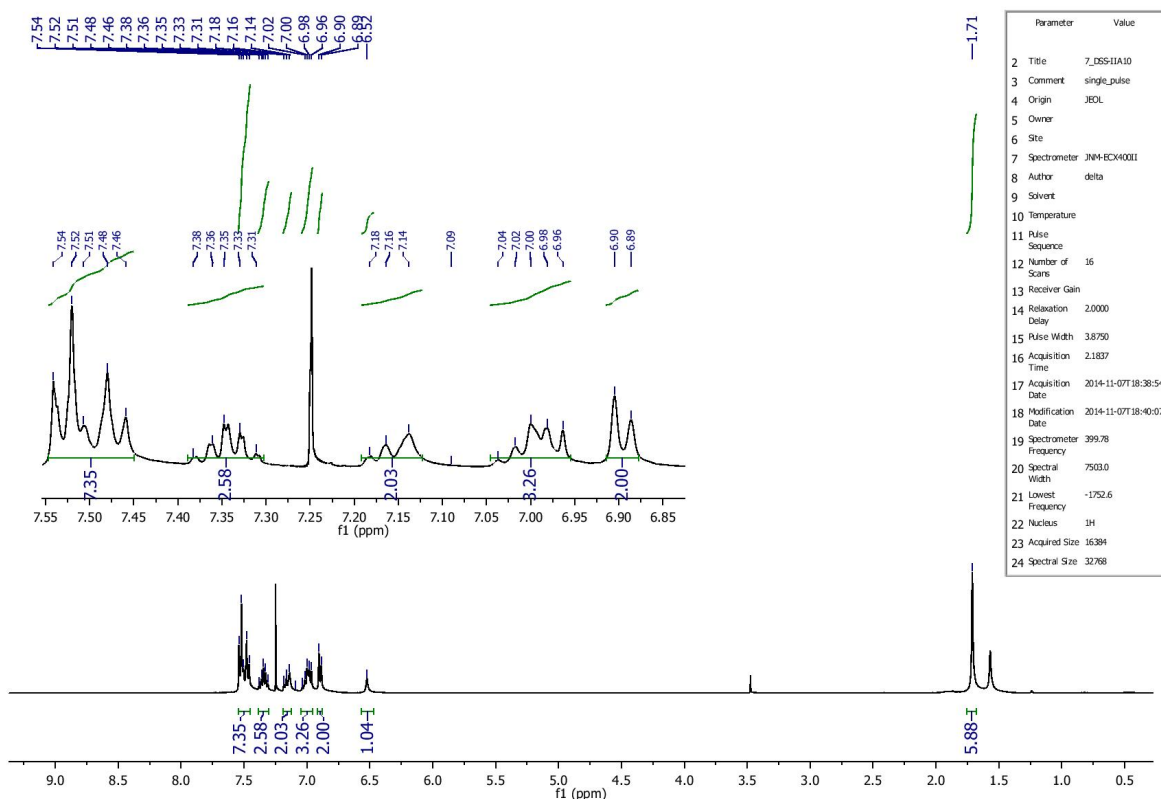

| Parameter                 | Value               |
|---------------------------|---------------------|
| 2 Title                   | 7_DSS-IIA10         |
| 3 Comment                 | single_pulse        |
| 4 Origin                  | JEOL                |
| 5 Owner                   |                     |
| 6 Site                    |                     |
| 7 Spectrometer            | JNM-ECK400II        |
| 8 Author                  | delta               |
| 9 Solvent                 |                     |
| 10 Temperature            |                     |
| 11 Pulse Sequence         |                     |
| 12 Number of Scans        | 16                  |
| 13 Receiver Gain          |                     |
| 14 Relaxation Delay       | 2.0000              |
| 15 Pulse Width            | 3.8750              |
| 16 Acquisition Time       | 2.1837              |
| 17 Acquisition Date       | 2014-11-07T19:38:54 |
| 18 Modification Date      | 2014-11-07T18:40:07 |
| 19 Spectrometer Frequency | 399.78              |
| 20 Spectral Width         | 7503.0              |
| 21 Lowest Frequency       | -1752.6             |
| 22 Nucleus                | 1H                  |
| 23 Acquired Size          | 16394               |
| 24 Spectral Size          | 32768               |

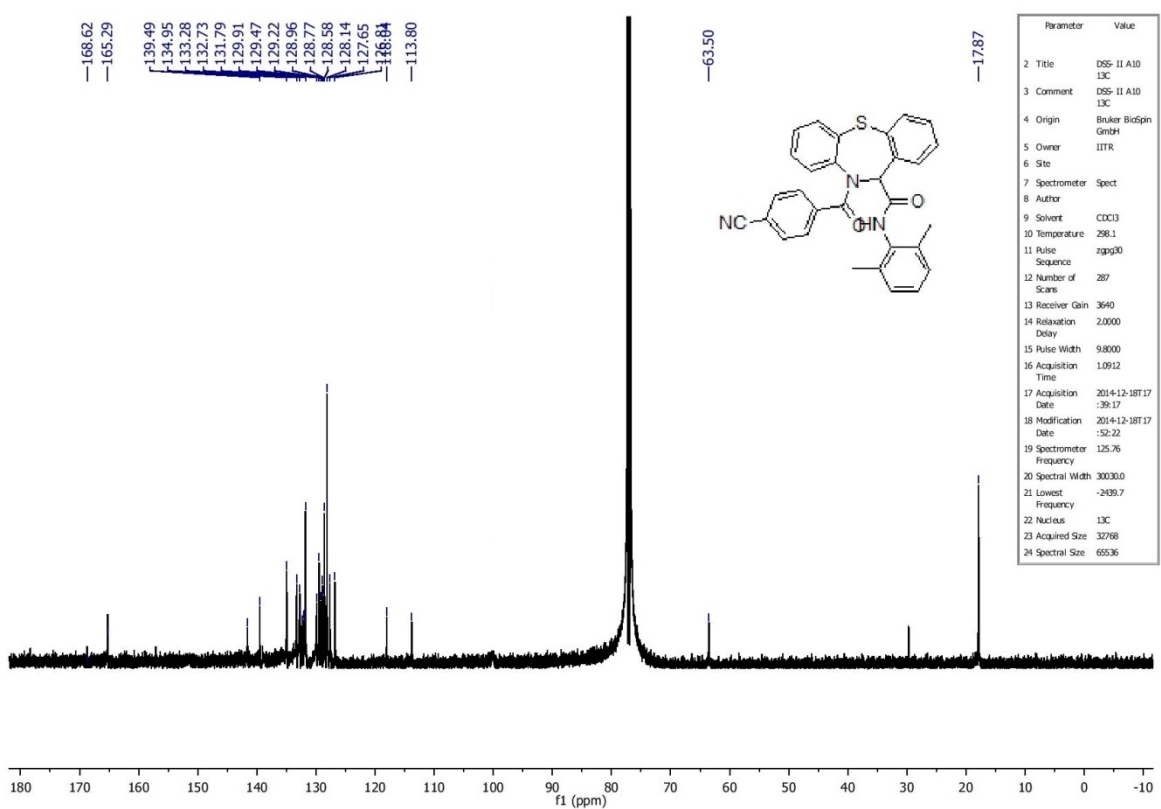

| Parameter                 | Value               |
|---------------------------|---------------------|
| 2 Title                   | DSS- II A10         |
| 3 Comment                 | 13C                 |
| 4 Origin                  | Bruker BioSpin GmbH |
| 5 Owner                   | IITR                |
| 6 Site                    |                     |
| 7 Spectrometer            | Spect               |
| 8 Author                  |                     |
| 9 Solvent                 | CDCl3               |
| 10 Temperature            | 296.1               |
| 11 Pulse Sequence         | zgpg30              |
| 12 Number of Scans        | 287                 |
| 13 Receiver Gain          | 3640                |
| 14 Relaxation Delay       | 2.0000              |
| 15 Pulse Width            | 9.8000              |
| 16 Acquisition Time       | 1.0912              |
| 17 Acquisition Date       | 2014-12-18T17:39:17 |
| 18 Modification Date      | 2014-12-18T17:52:22 |
| 19 Spectrometer Frequency | 125.76              |
| 20 Spectral Width         | 30030.0             |
| 21 Lowest Frequency       | -2499.7             |
| 22 Nucleus                | 13C                 |
| 23 Acquired Size          | 32768               |
| 24 Spectral Size          | 65536               |



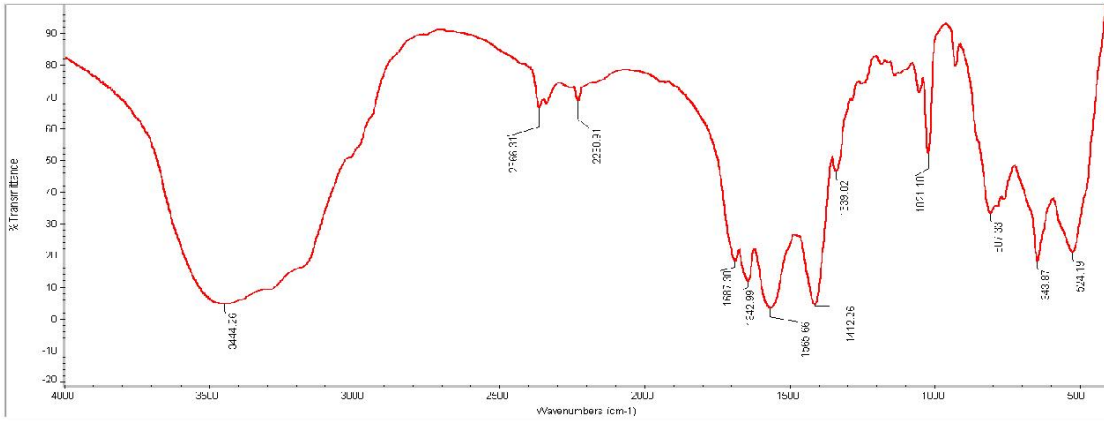

**5) 10-(4-chlorobenzoyl)-N-(2,6-dimethylphenyl)-10,11-dihydrodibenzo[b,f][1,4]thiazepine-11-carboxamide 6c**

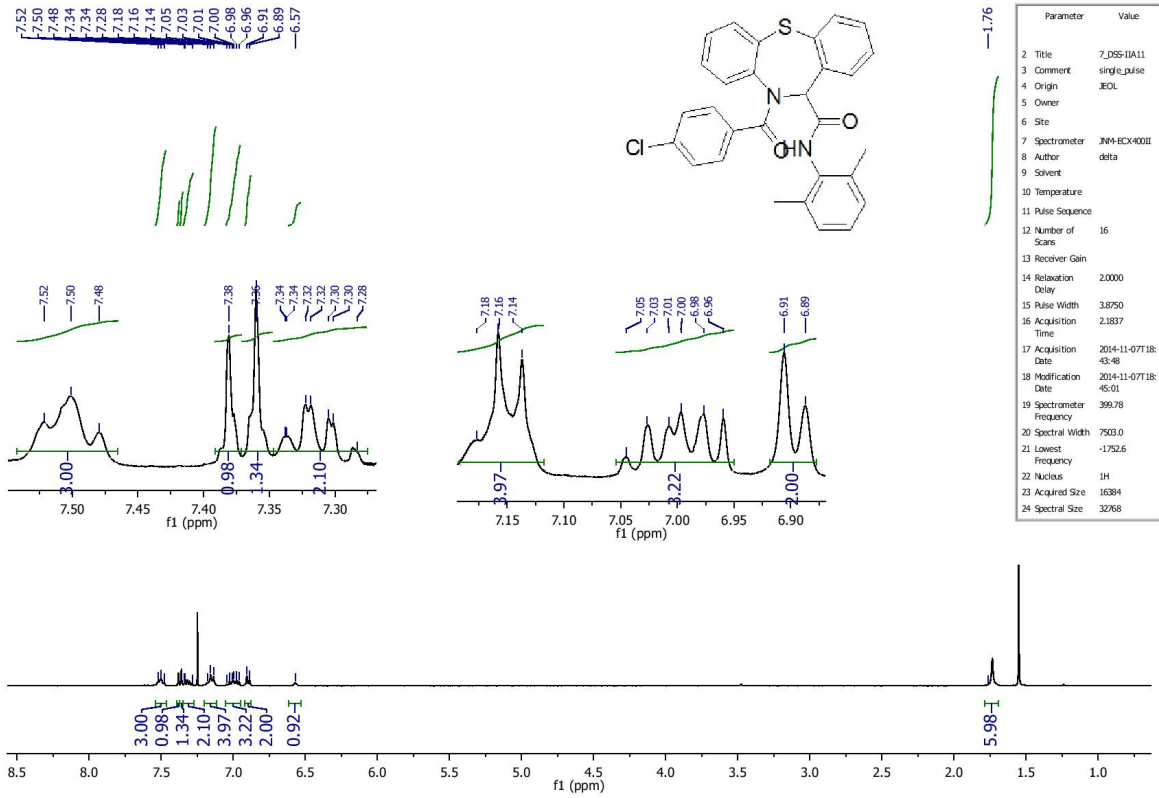

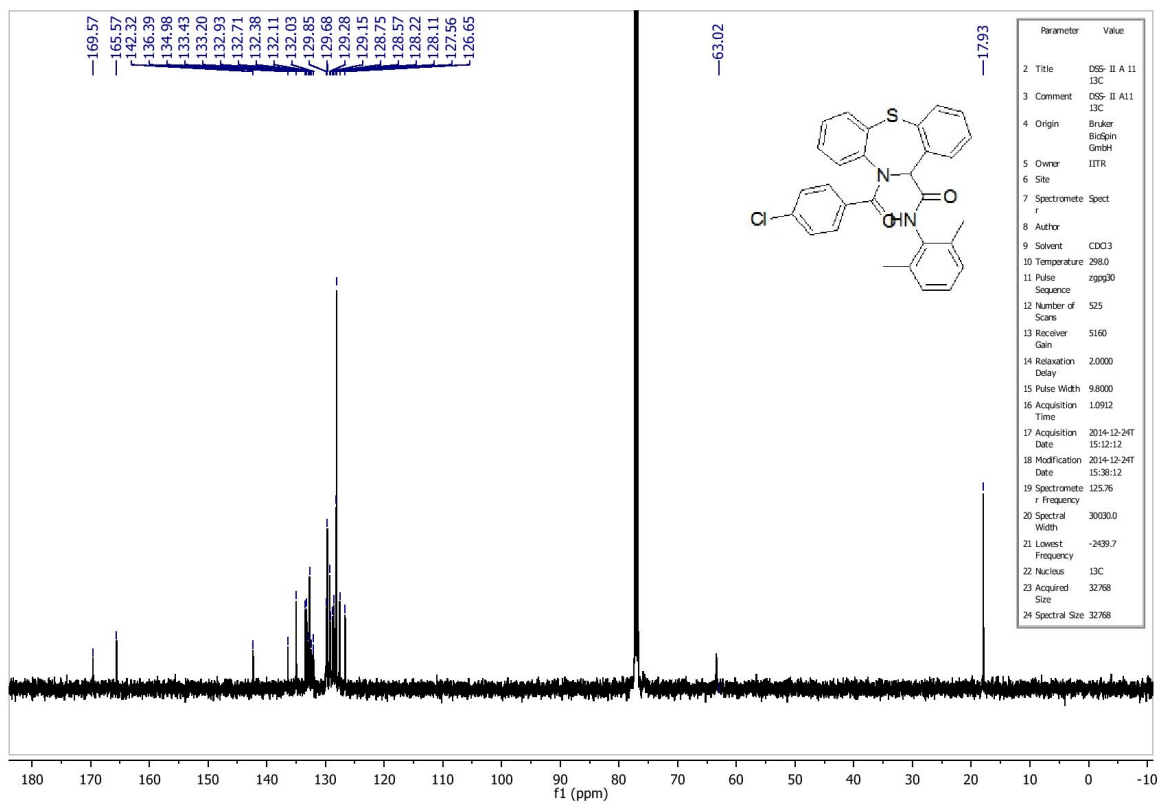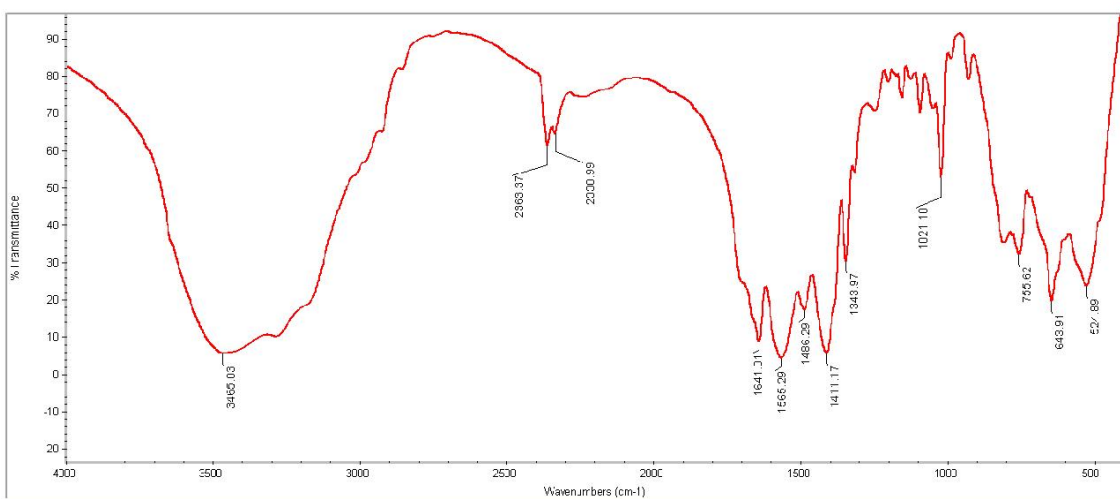

## 6) 10-benzoyl-N-(2,6-dimethylphenyl)-10,11-dihydrodibenzo[b,f][1,4]thiazepine-11-carboxamide 6f

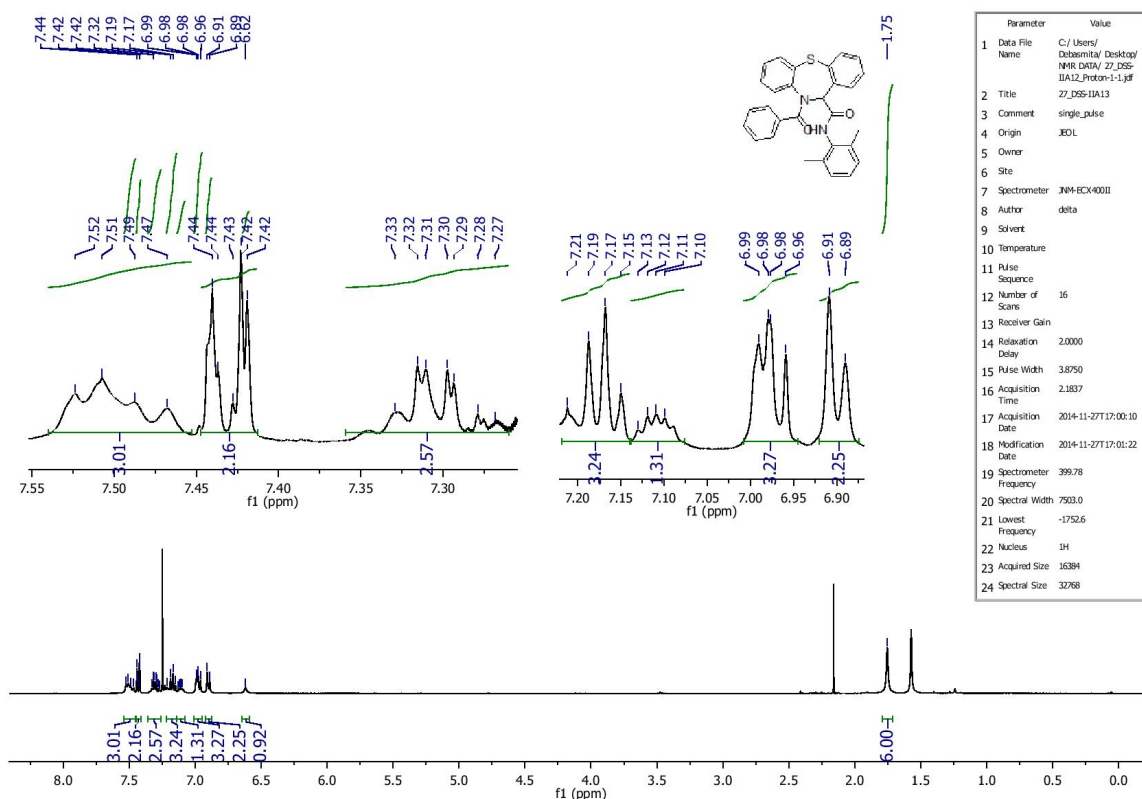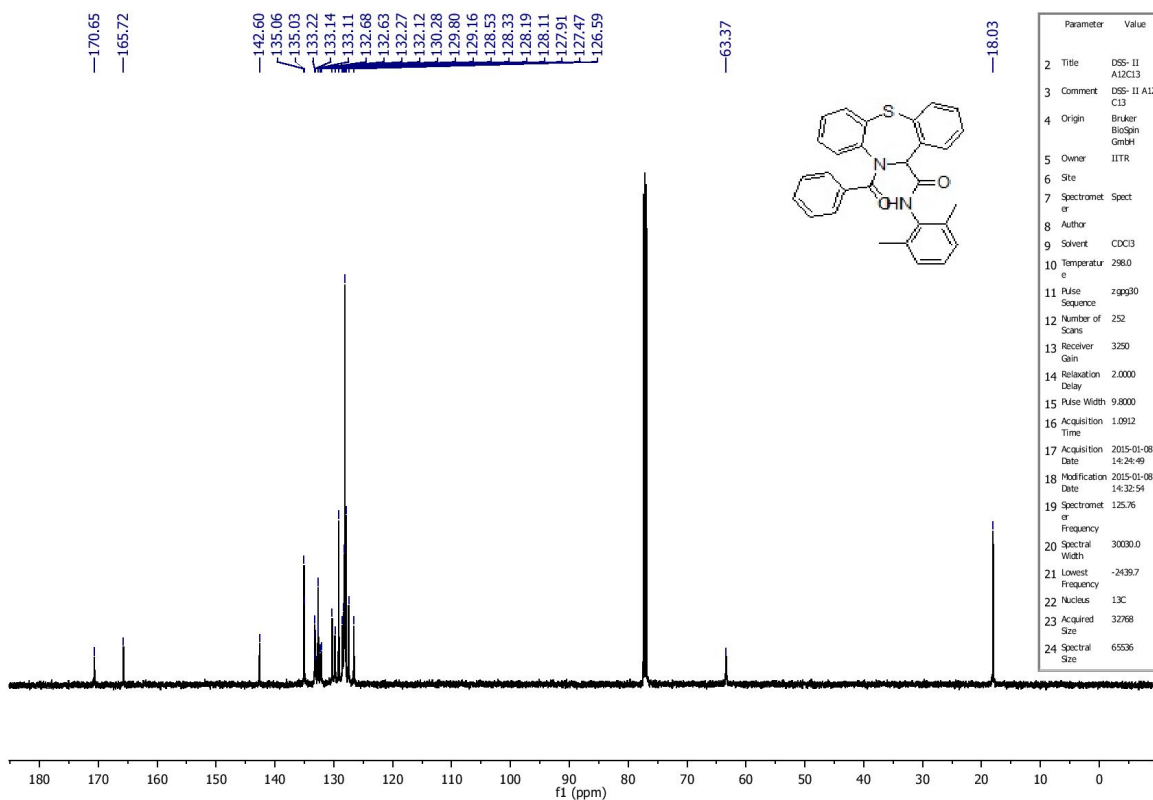

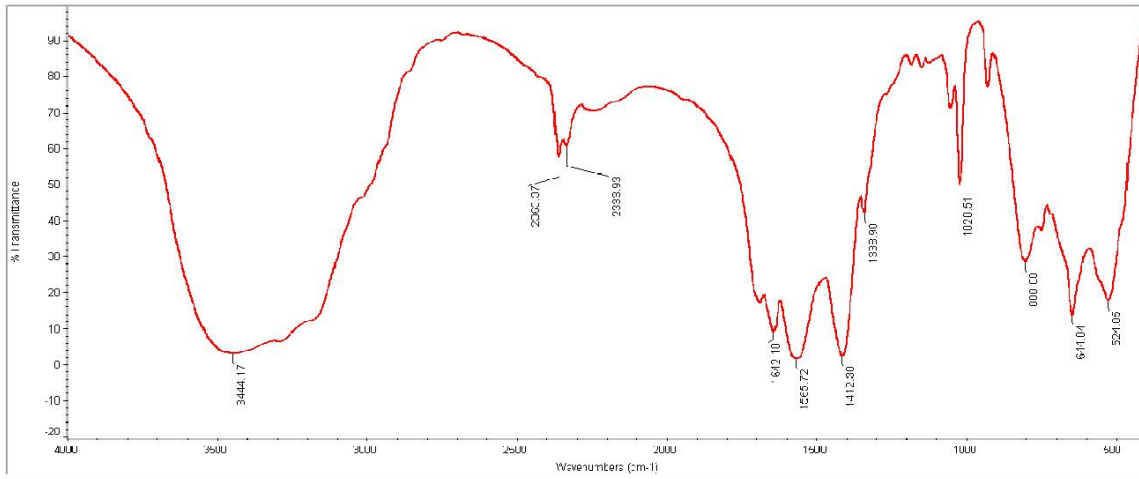

7) *N*-(2, 6-dimethylphenyl)-10-(2-phenylacetyl)-10, 11-dihydrodibenzo[*b,f*][1,4]thiazepine-11-carboxamide **6g**

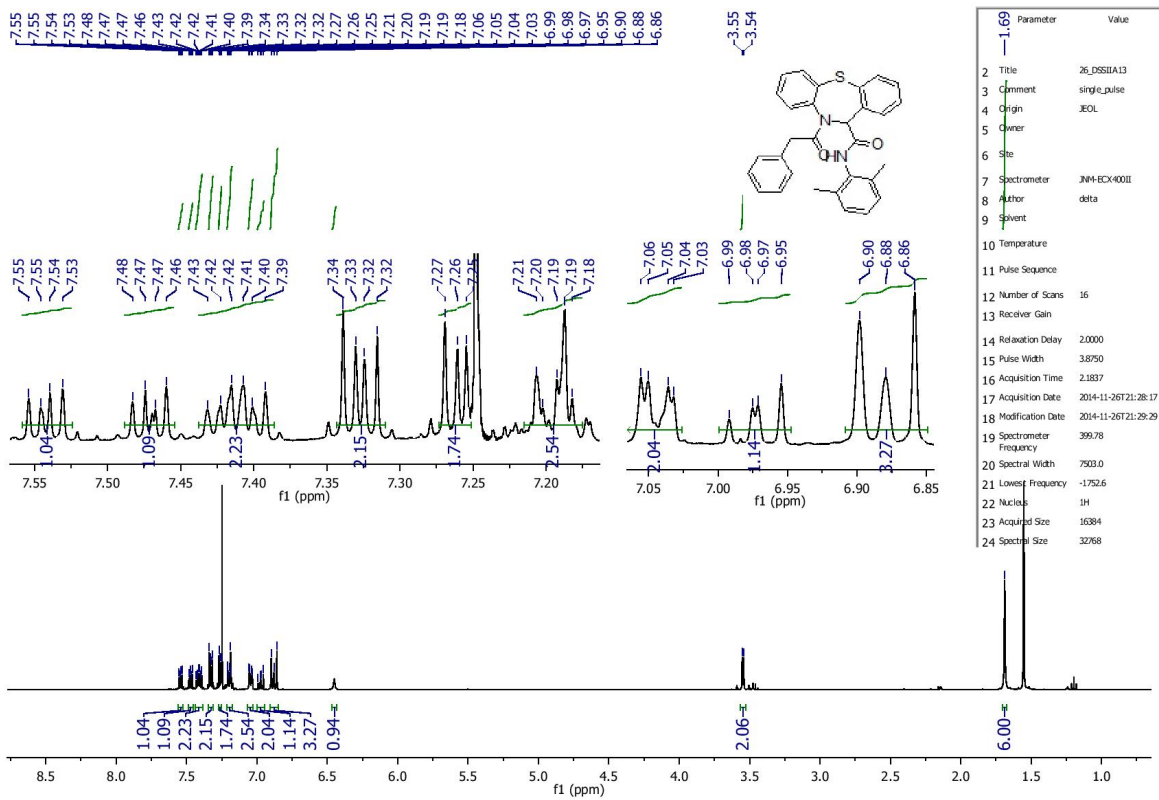

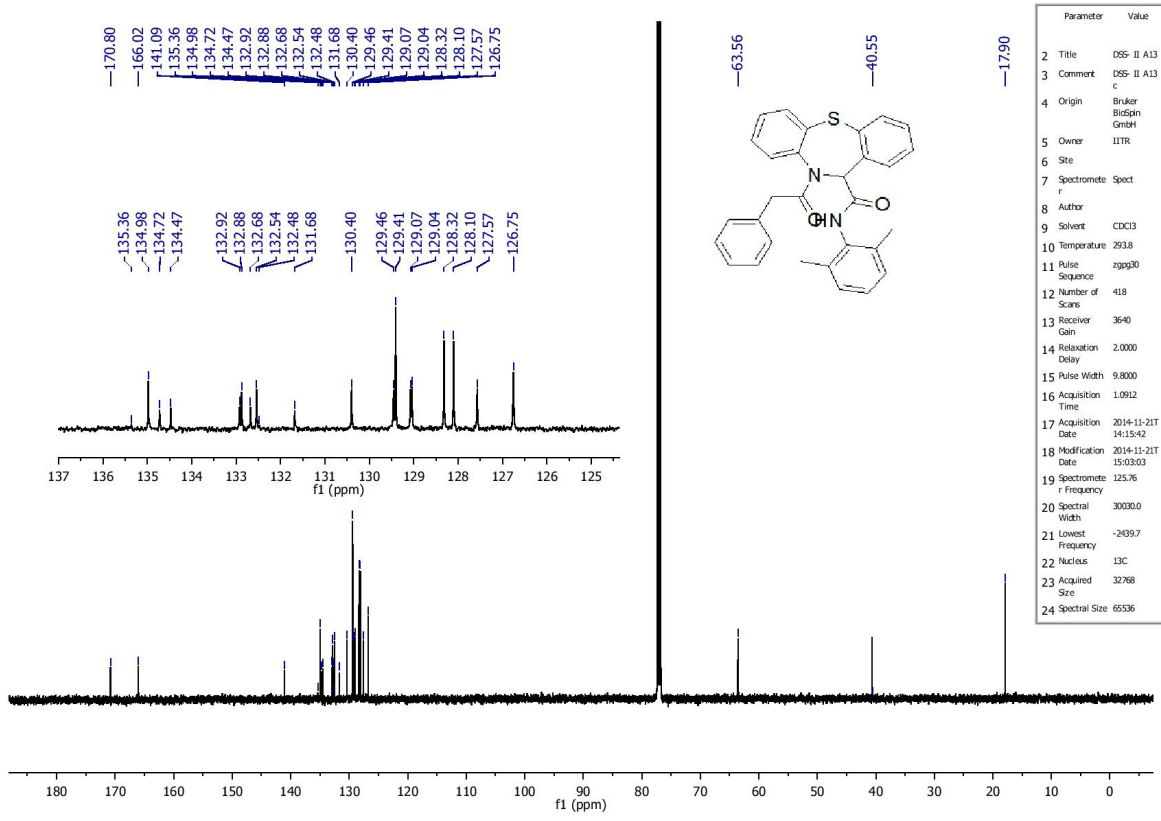

| Parameter                 | Value               |
|---------------------------|---------------------|
| 2 Title                   | DSS- II A13         |
| 3 Comment                 | DSS- II A13         |
| 4 Origin                  | Bruker BioSpin GmbH |
| 5 Owner                   | IITR                |
| 6 Site                    |                     |
| 7 Spectrometer            | Spect               |
| 8 Author                  |                     |
| 9 Solvent                 | CDCl3               |
| 10 Temperature            | 293.8               |
| 11 Pulse Sequence         | zgpg30              |
| 12 Number of Scans        | 418                 |
| 13 Receiver Gain          | 3640                |
| 14 Relaxation Delay       | 2.0000              |
| 15 Pulse Width            | 9.8000              |
| 16 Acquisition Time       | 1.0912              |
| 17 Acquisition Date       | 2014-11-21T14:15:42 |
| 18 Modification Date      | 2014-11-21T15:03:03 |
| 19 Spectrometer Frequency | 125.76              |
| 20 Spectral Width         | 30000.0             |
| 21 Lowest Frequency       | -2499.7             |
| 22 Nucleus                | 13C                 |
| 23 Acquired Size          | 32768               |
| 24 Spectral Size          | 65536               |

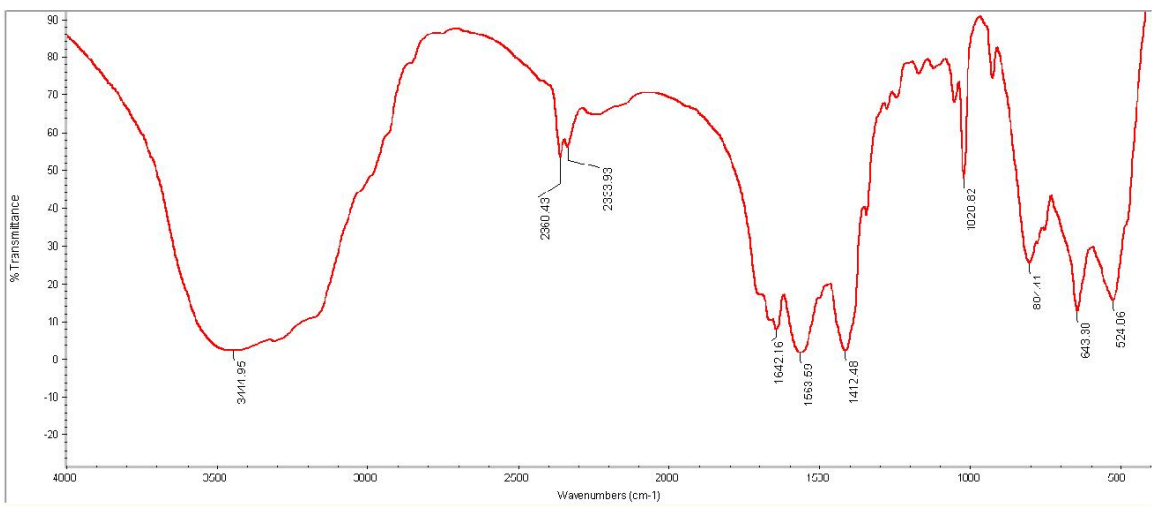

8) *N*-(2,6-dimethylphenyl)-10-(4-nitrobenzoyl)-10,11-dihydrodibenzo[*b,f*][1,4]thiazepine-11-carboxamide **6h**

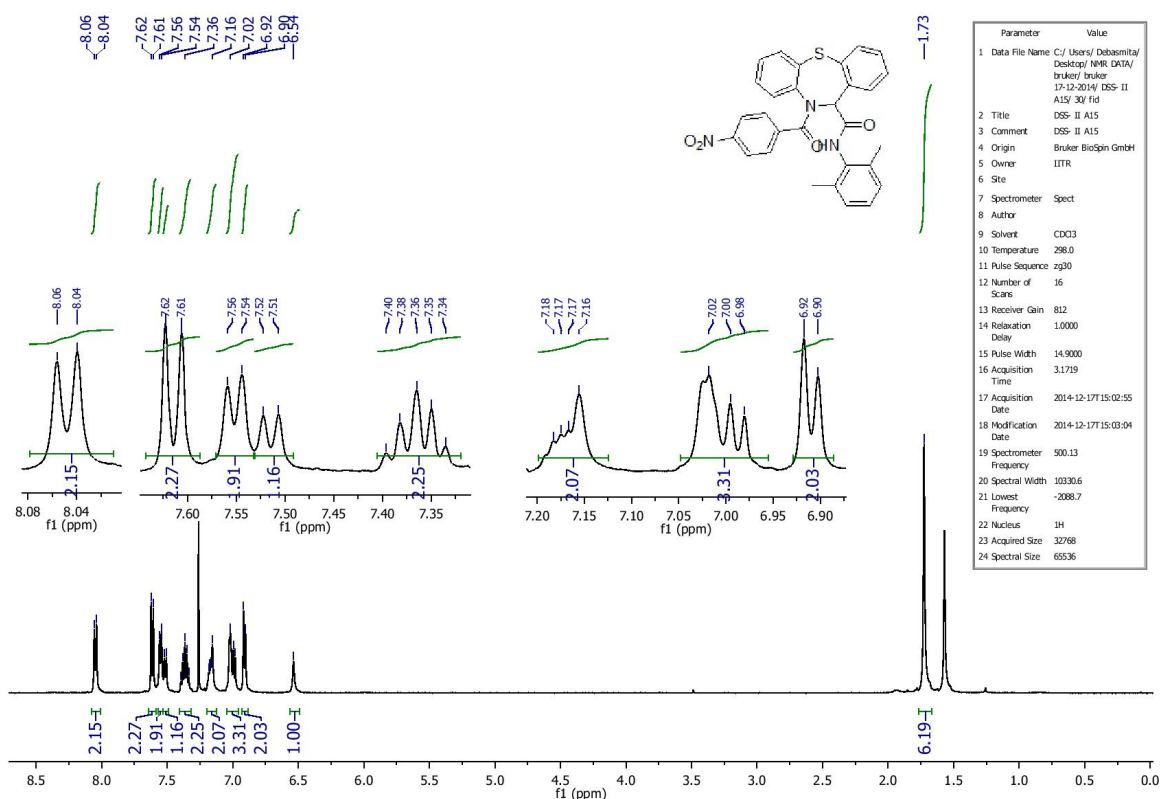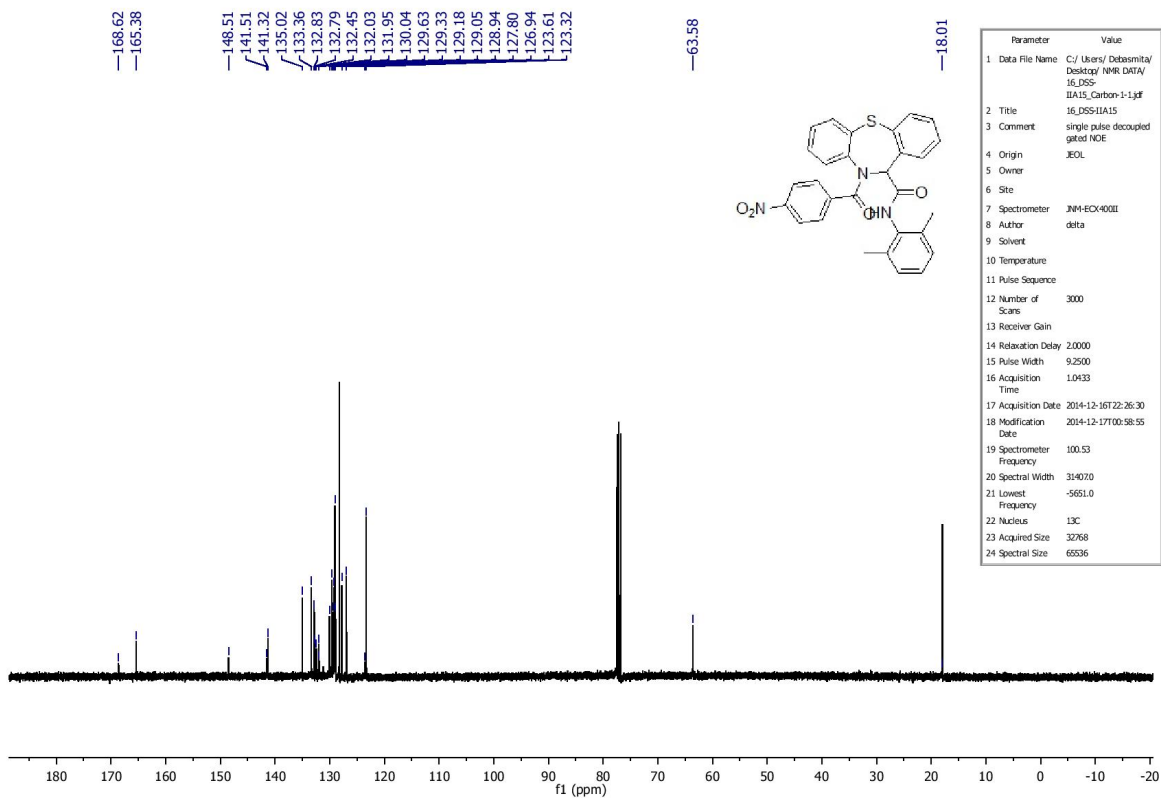

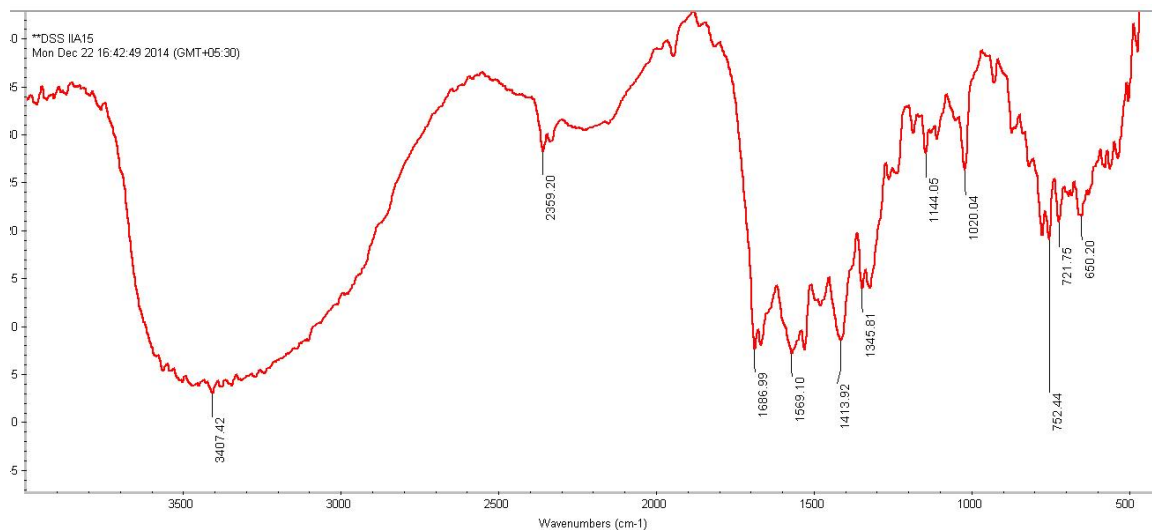

**9) *N*-cyclohexyl-10-(4-nitrobenzoyl)-10,11-dihydrodibenzo[*b,f*][1,4]thiazepine-11-carboxamide **6i****

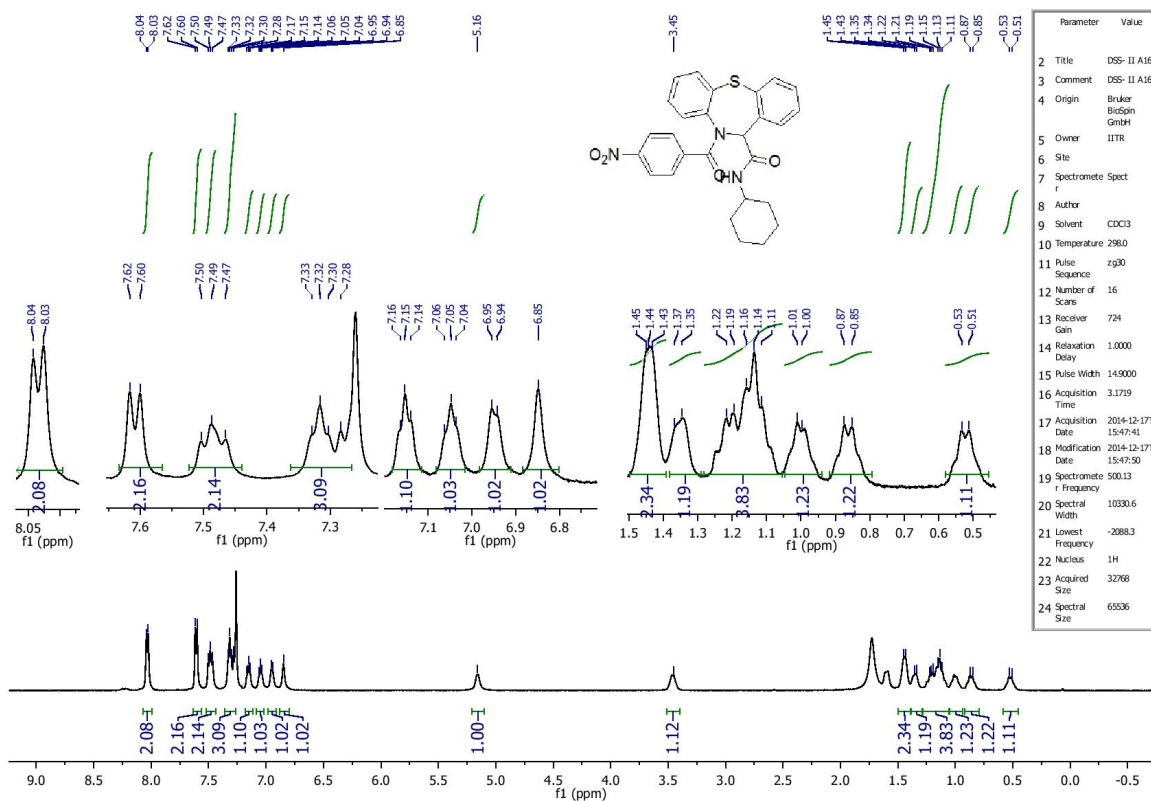

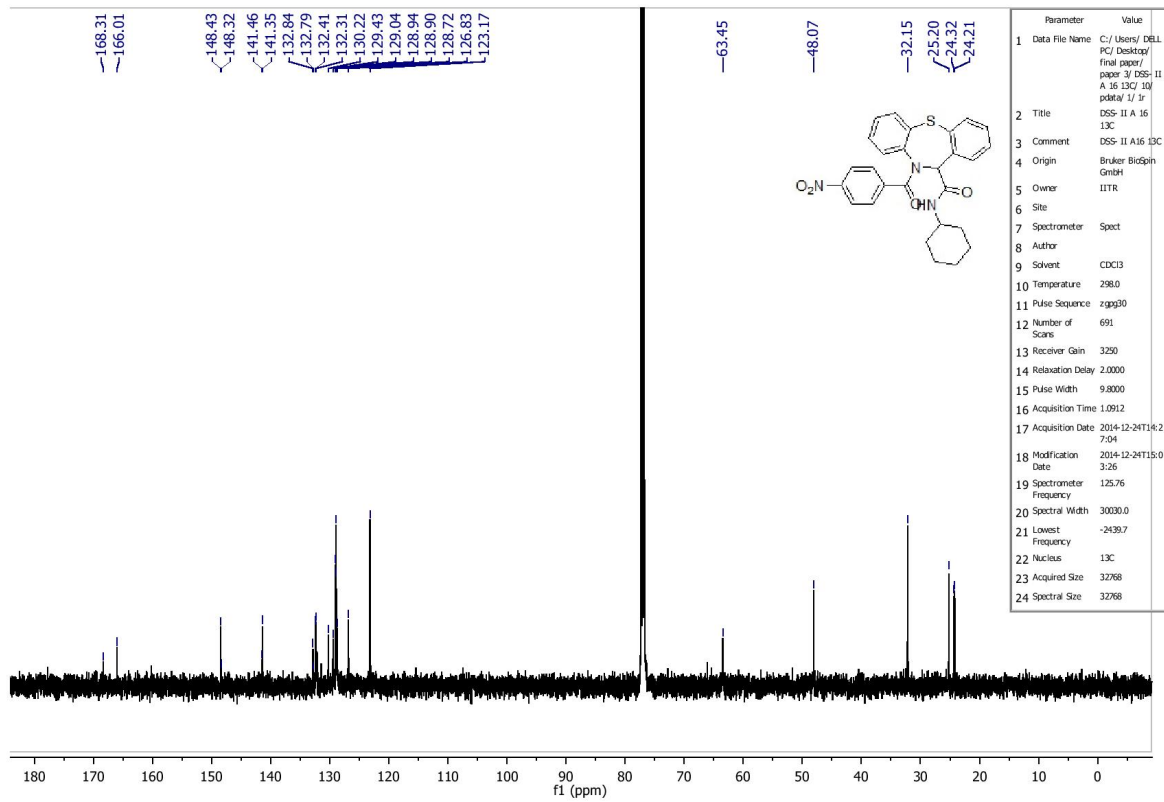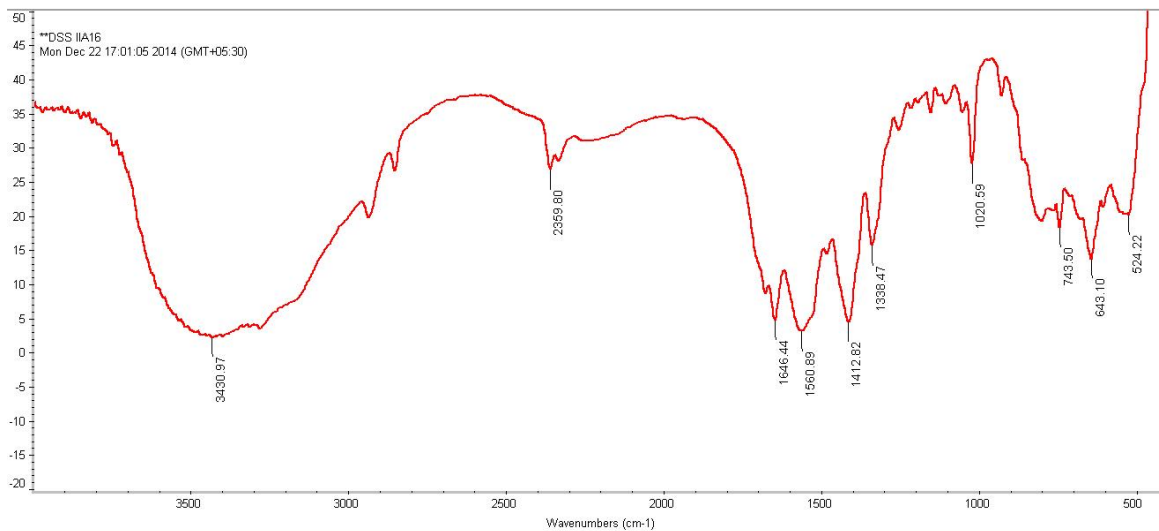



10) *N*-(*tert*-butyl)-10-(3,5-dinitrobenzoyl)-10,11-dihydrodibenzo[*b,f*][1,4]thiazepine-11-carboxamide **6j**

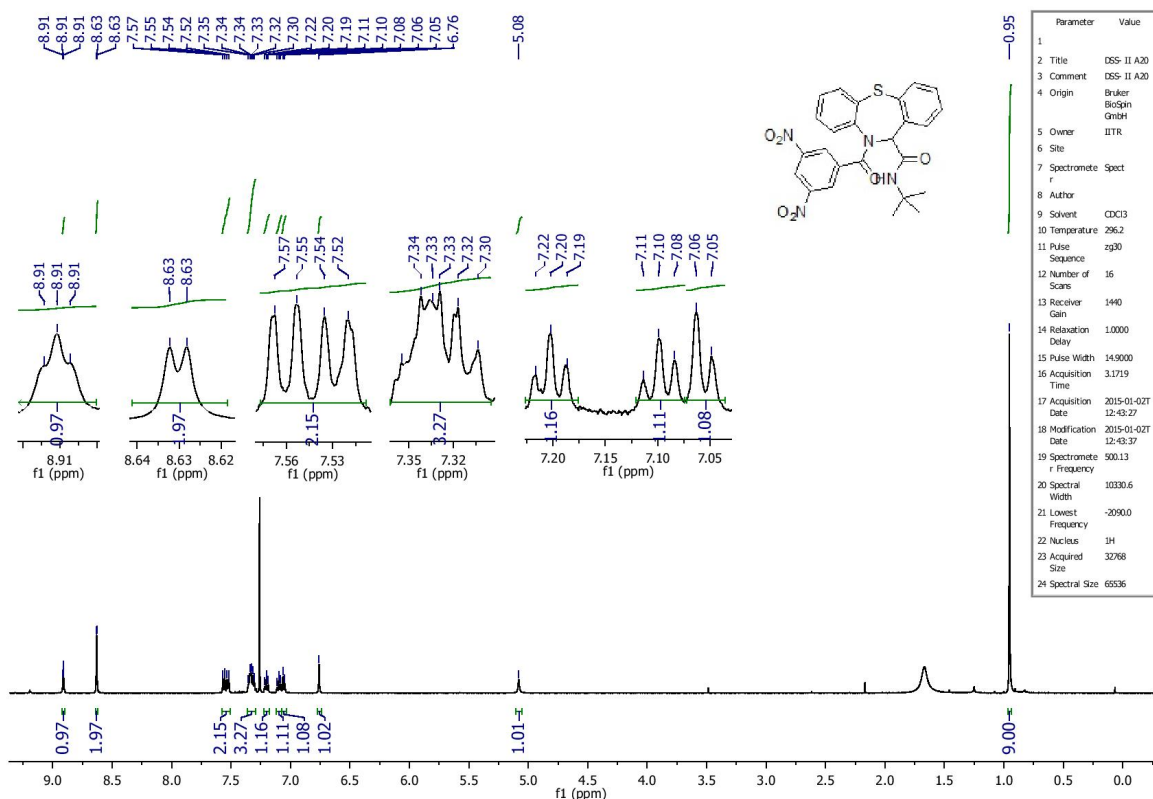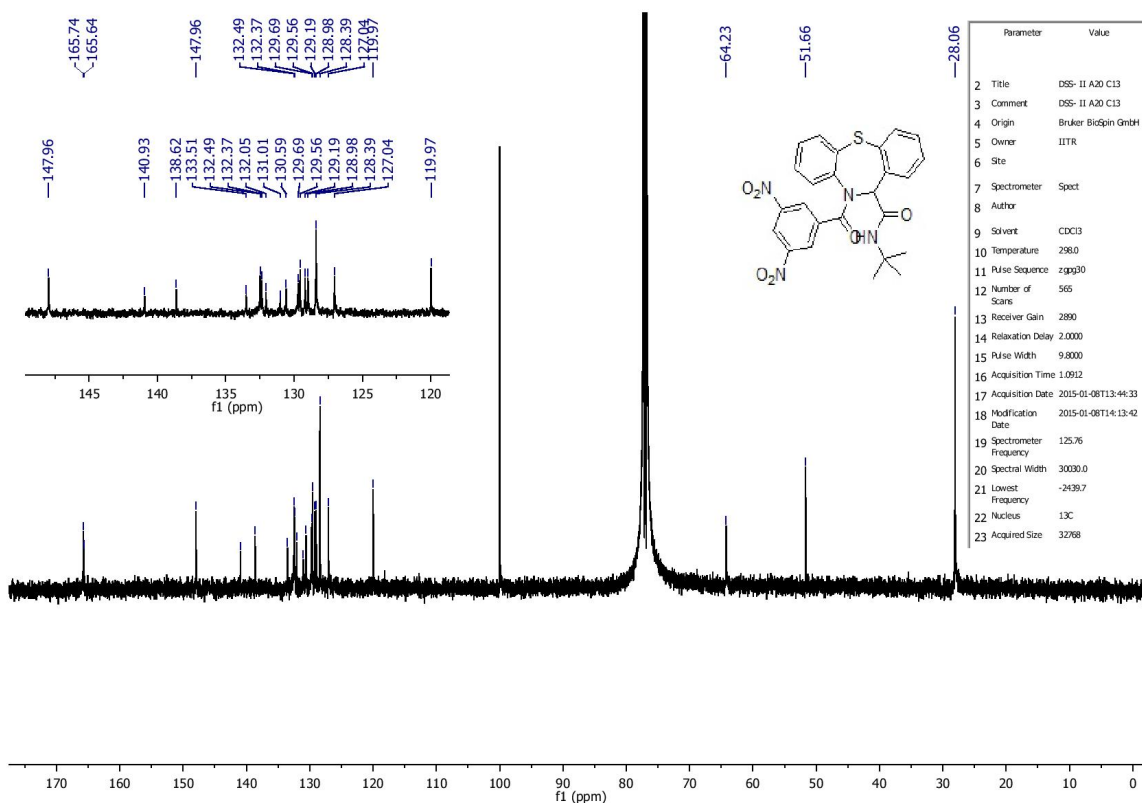

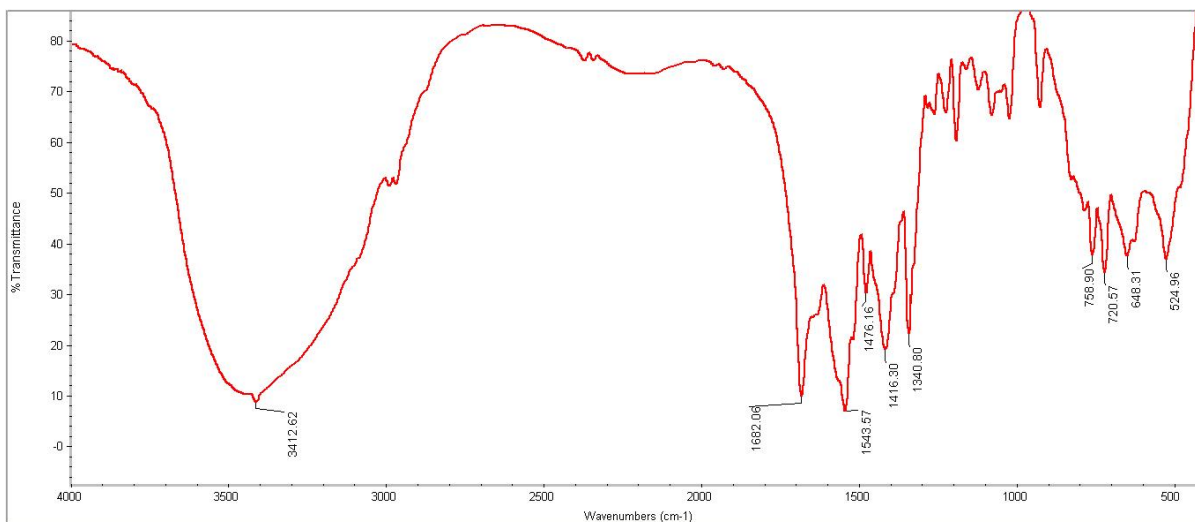

**11) *N*-(2,6-dimethylphenyl)-10-(3,5-dinitrobenzoyl)-10,11 dihydrodibenzo[*b,f*] [1,4]thiazepine-11-carboxamide **6k****

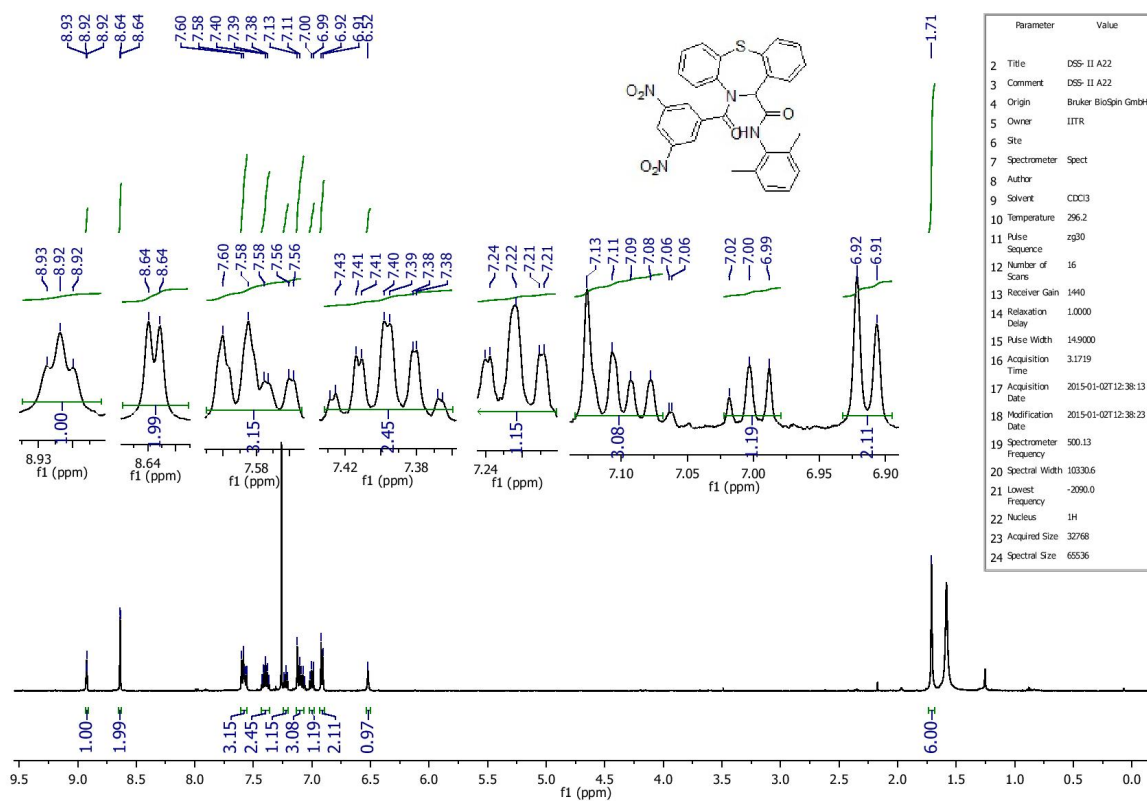

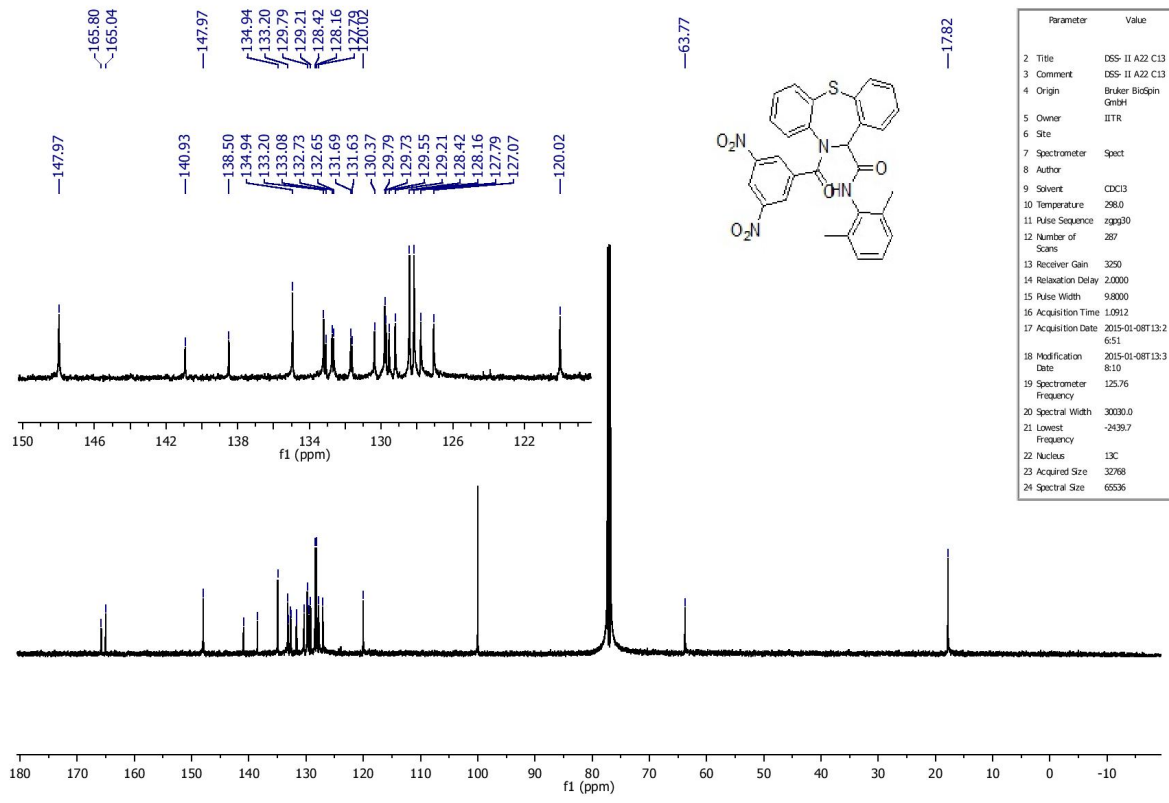

| Parameter                 | Value               |
|---------------------------|---------------------|
| 2 Title                   | DSS-11 A22 C13      |
| 3 Comment                 | DSS-11 A22 C13      |
| 4 Origin                  | Bruker BioSpin GmbH |
| 5 Owner                   | IITR                |
| 6 Site                    |                     |
| 7 Spectrometer            | Spect               |
| 8 Author                  |                     |
| 9 Solvent                 | CDCl3               |
| 10 Temperature            | 298.0               |
| 11 Pulse Sequence         | zgpg30              |
| 12 Number of Scans        | 287                 |
| 13 Receiver Gain          | 3250                |
| 14 Relaxation Delay       | 2.0000              |
| 15 Pulse Width            | 9.8000              |
| 16 Acquisition Time       | 1.0912              |
| 17 Acquisition Date       | 2015-01-08T13:26:51 |
| 18 Modification Date      | 2015-01-08T13:38:10 |
| 19 Spectrometer Frequency | 125.76              |
| 20 Spectral Width         | 30030.0             |
| 21 Lowest Frequency       | -2439.7             |
| 22 Nucleus                | 13C                 |
| 23 Acquired Size          | 32768               |
| 24 Spectral Size          | 6536                |

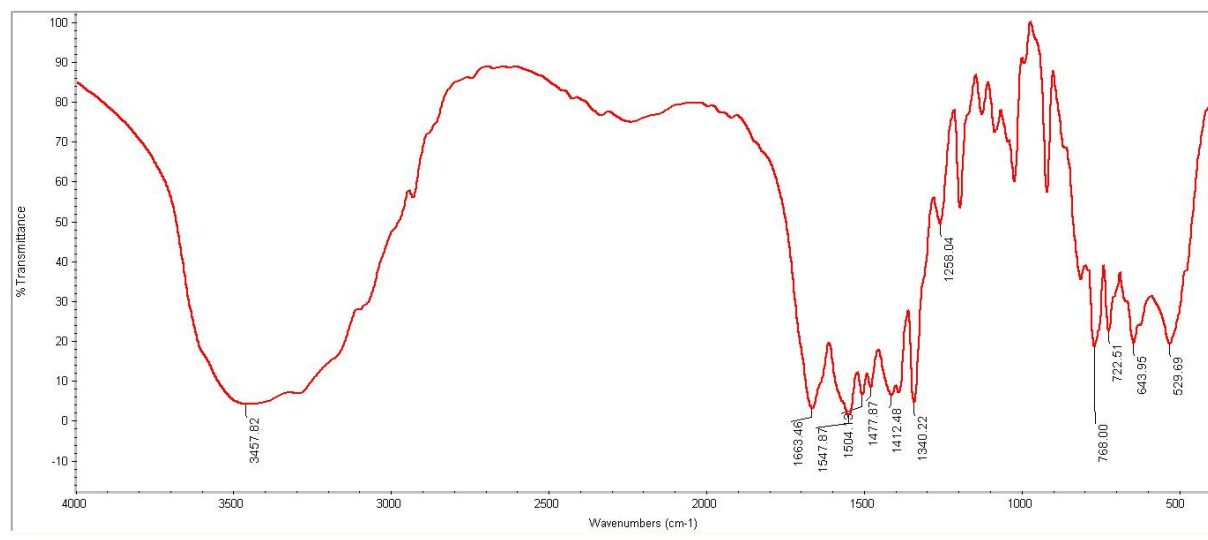

**12) N-(tert-Butyl)-10-(4-chlorobenzoyl)-2-nitro-10,11-dihydrodibenzo[b,f][1,4]thiazepine-11-carboxamide 6l.**

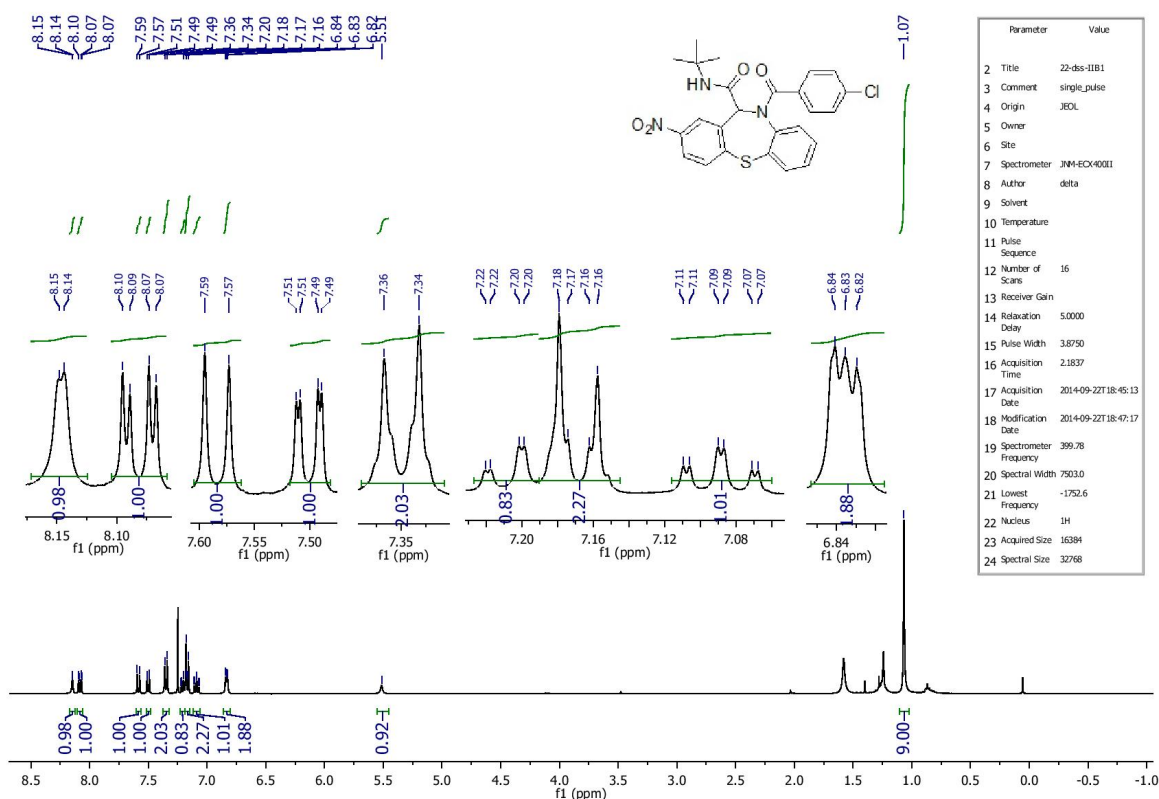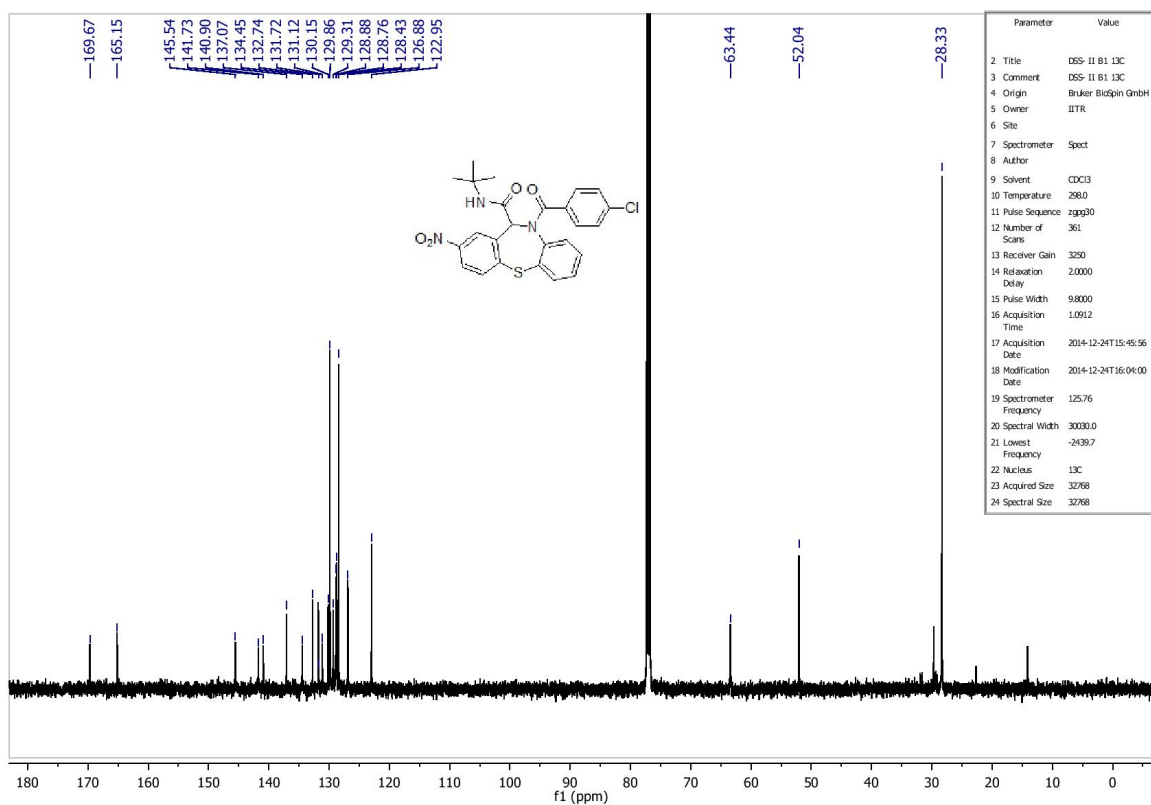

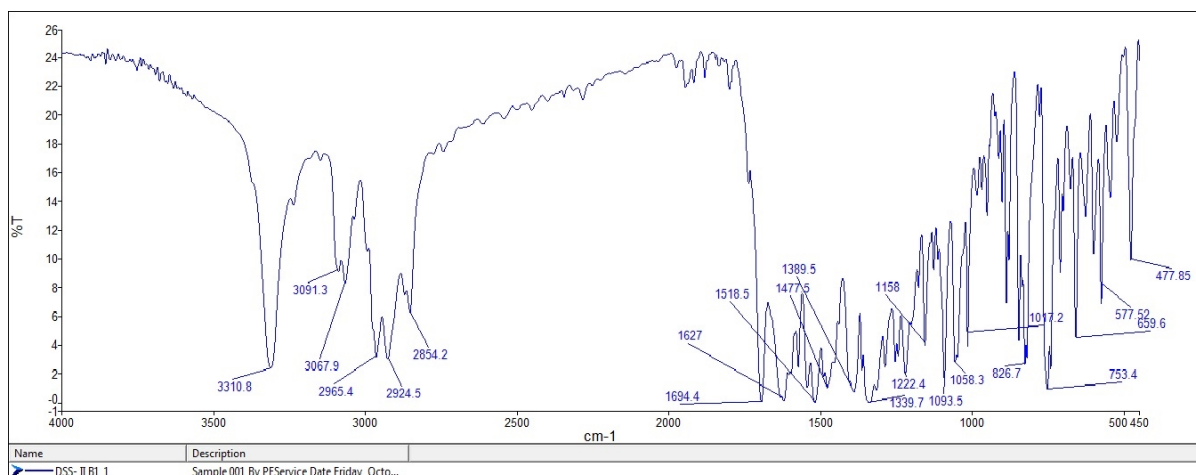

### 13) 10-(4-Chlorobenzoyl)-N-cyclohexyl-2-nitro-10,11-dihydrodibenzo[b,f][1,4]thiazepine-11-carboxamide 6m.

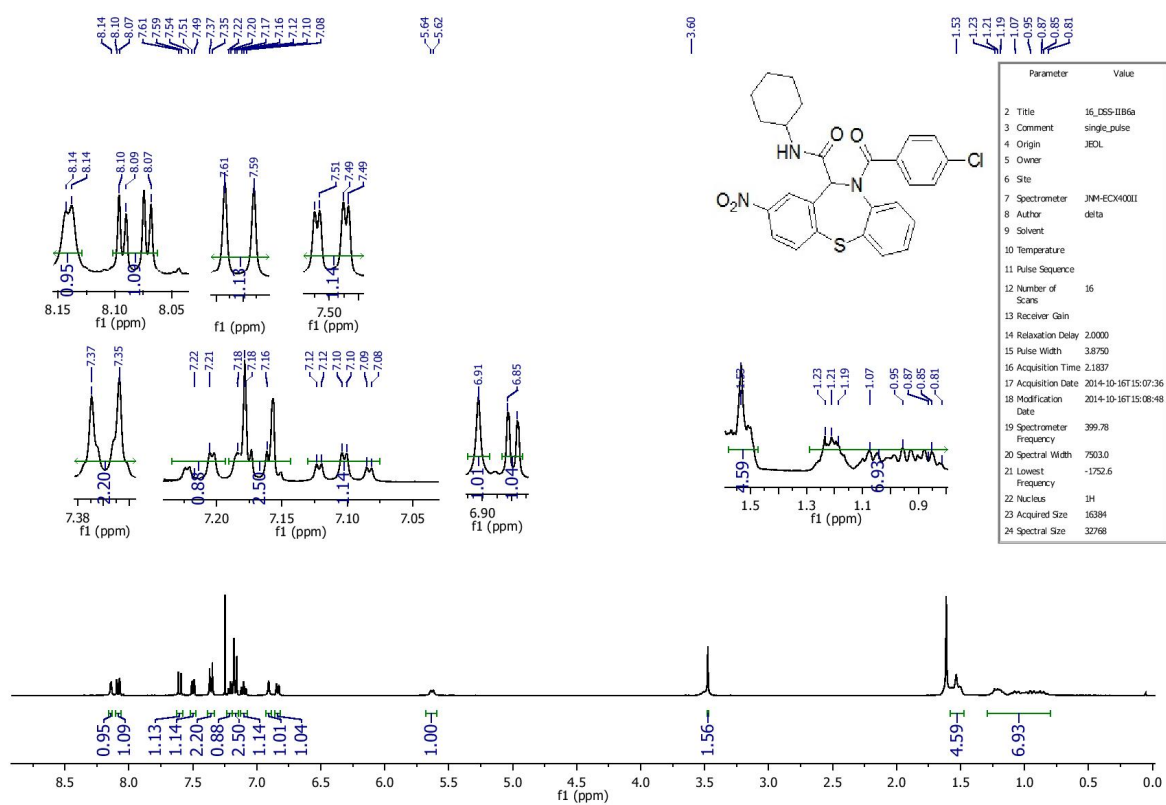

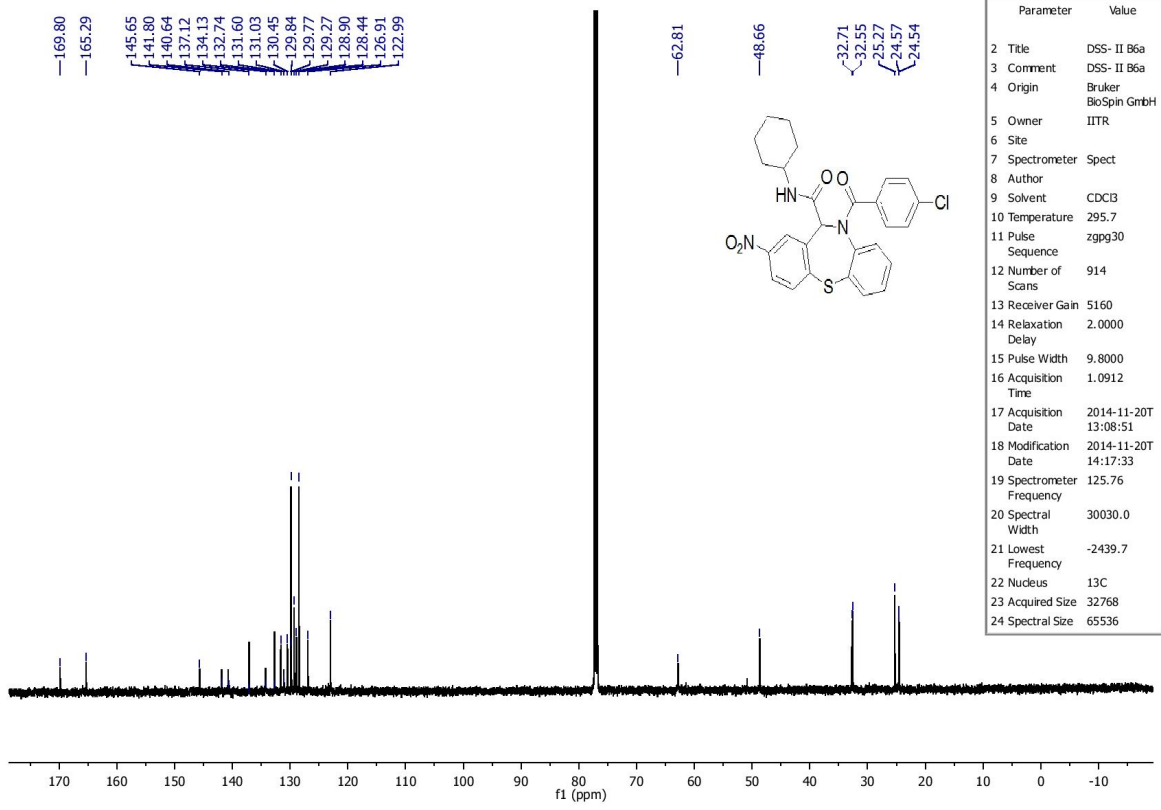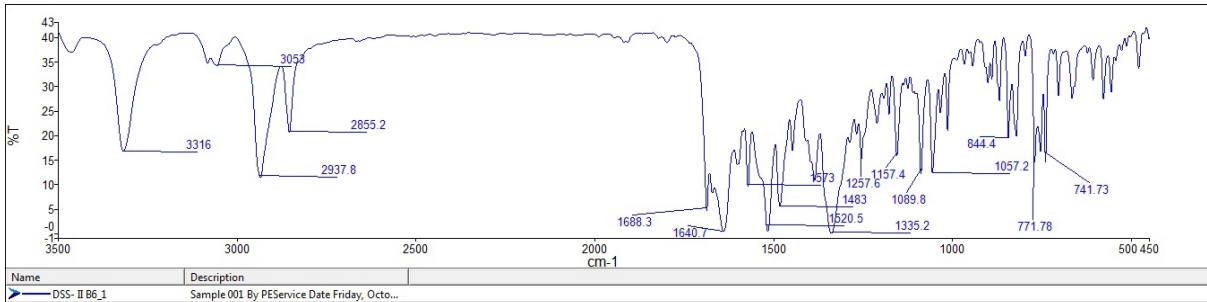

## GC Analysis of the reaction between 1a and 2a

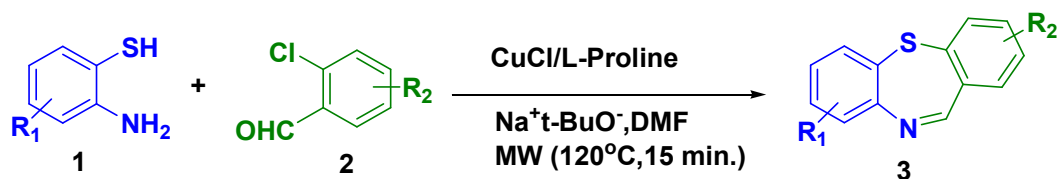

The above reaction was monitored by GC-MS. After 2 min the GC Chromatogram indicated the formation of the Schiff base **B** with mass 245 (retention time: 18.91min.) in maximum percentage.

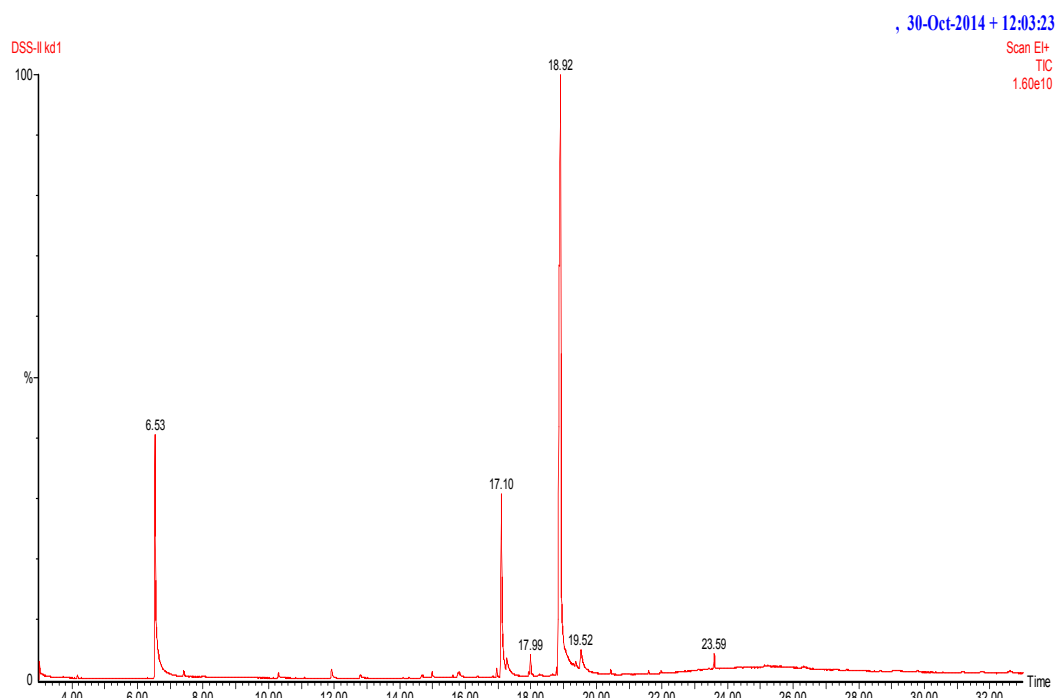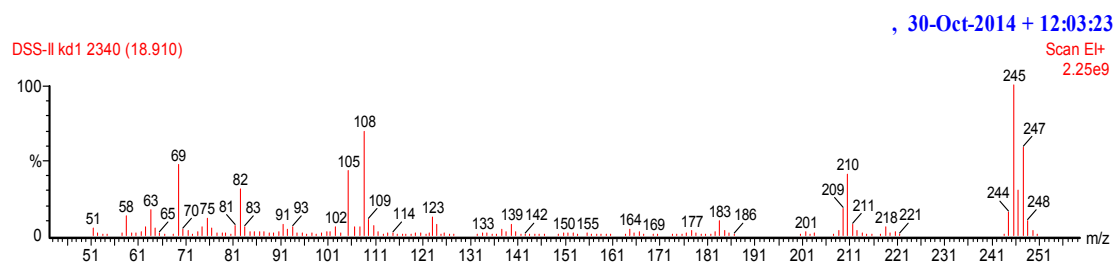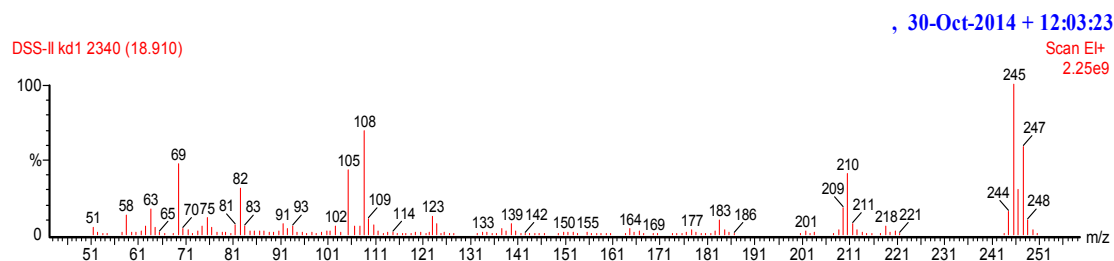

Supplement: c5ra04175a1.pdf [file c5ra04175a1.pdf]
